# Supplementary material
Source: PubMed Central journal article supplement (PMC7406261)
Supplement: jciinsight-5-136852-s053.pdf [file jciinsight-5-136852-s053.pdf]

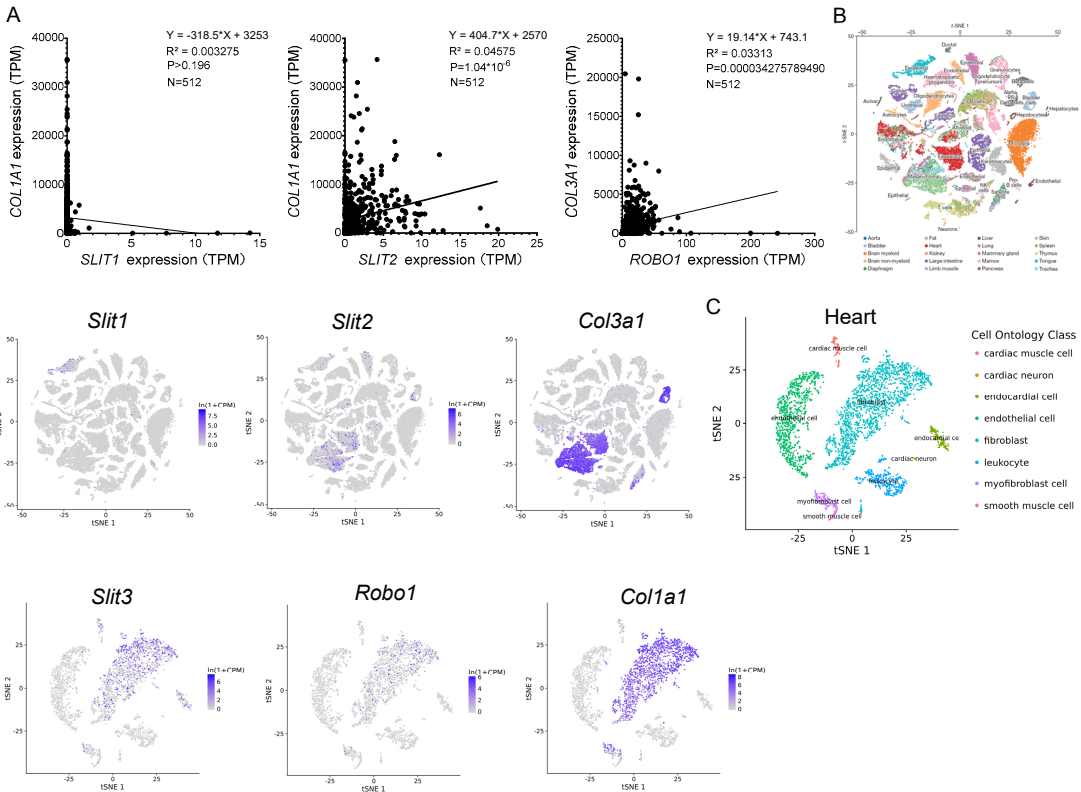

**Supplemental Figure 1. SLIT3 is present at high levels in fibrillar collagen-producing cells. (A)** Linear regression analysis between the transcript levels of *SLIT1* and *COL1A1*, *SLIT2* and *COL1A1*, *ROBO1* and *COL3A1* across 512 cell lines from the FANTOM 5 project. Transcripts per million, TPM. **(B)** Single cell transcriptome data from the Tabula Muris project. t-SNE plot of all cells collected by FACS, colored by organ, overlaid with the predominant cell type composing each cluster ( $n = 44,949$  individual cells from 20 mouse organs) and the clusters of cells expressing *Slit1*, *Slit2*, *Col3a1*. **(C)** Cells for heart visualized with t-SNE, colored by cell type, and the clusters of cells expressing *Slit3*, *Robo1*, and *Col1a1*.

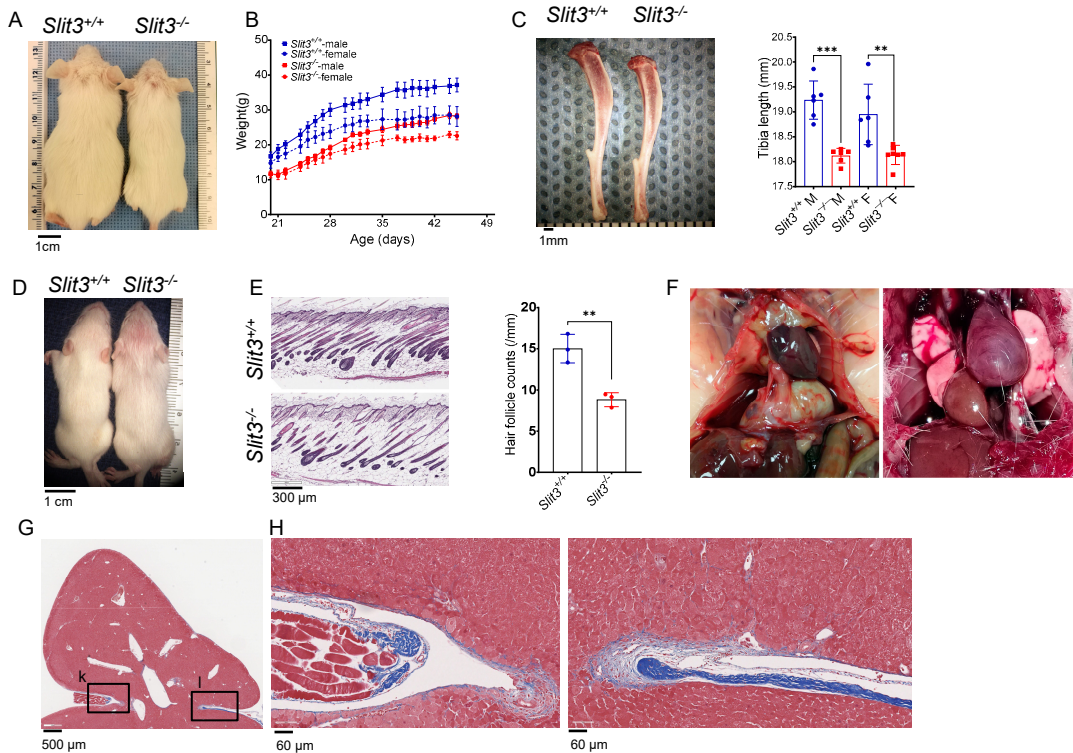

**Supplemental Figure 2. Phenotypic manifestations of *Slit3*<sup>-/-</sup> CD1 mice.** (A) Representative image of 21-day-old mice. Scale bar, 1cm. (B) Quantification of body weight in 3-7 weeks old *Slit3*<sup>-/-</sup> and WT mice (*Slit3*<sup>+/+</sup> n=11, F=6, M=5; *Slit3*<sup>-/-</sup> n=9, F=4, M=5). (C) Representative image of tibia (male) and quantification of tibia length in 8-week-old *Slit3*<sup>-/-</sup> and WT mice (n=6 per group). Scale bar, 1mm. (D) Representative image of hair follicle density in weight-matched 12-day-old *Slit3*<sup>-/-</sup> and WT male mice. Scale bar 1cm. (E) Representative histological longitudinal sections (haematoxylin and eosin stain) and quantification of hair follicle density in dorsal skin in 10-day-old male mice (n=3 per group). Scale bar, 300 μm. (F) Representative images of central congenital diaphragmatic hernia (CDH) in *Slit3*<sup>-/-</sup> mice. From left to right, stomach or liver in hernia sac. (G) Sagittal Masson's trichrome-stained section of a central CDH (liver in hernia sac) in a 10-week-old male mouse. Scale bar, 500 μm. (H) Higher-magnification views of the boxed areas indicated in G. Scale bar, 60 μm. Data are presented as mean±SD. Number (n), male (M), female (F). \*P < 0.05, \*\*P < 0.01, \*\*\*P < 0.001 vs. WT mice using the unpaired two-tailed Student's t-test.

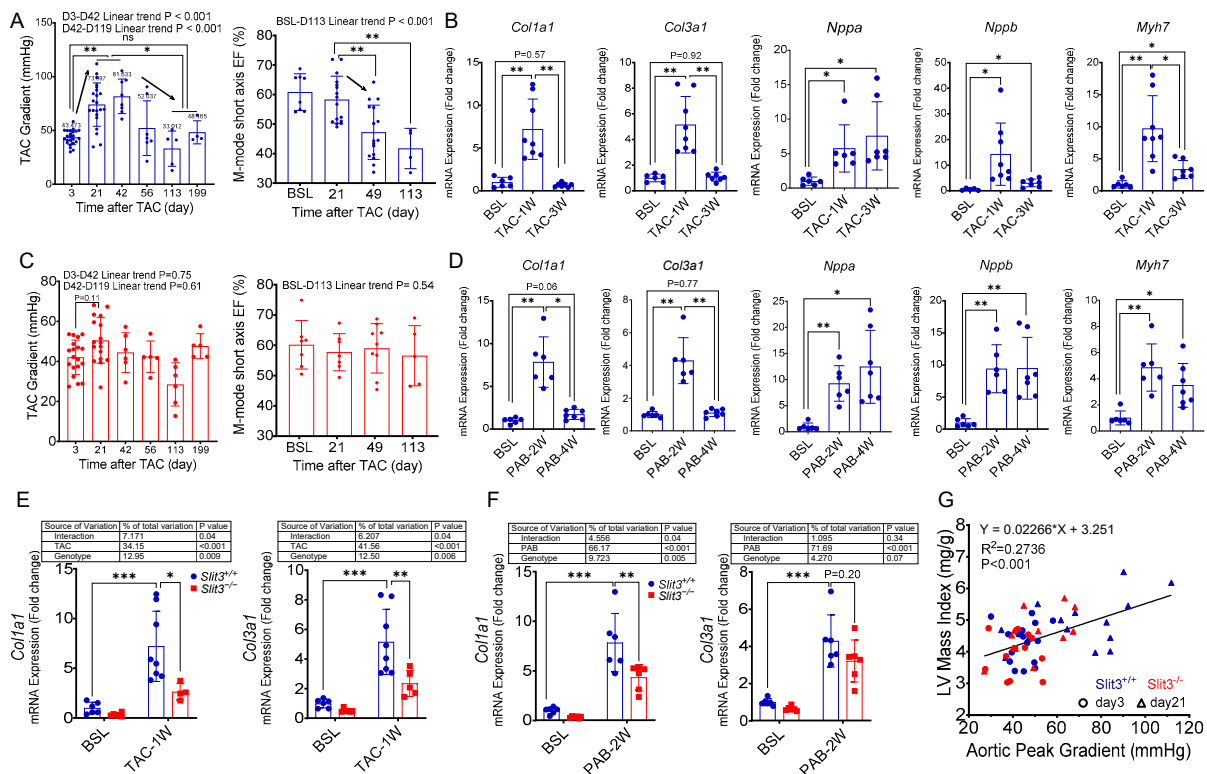

**Supplemental Figure 3. TAC or PAB peak pressure gradient and the expression levels of cardiac remodeling-related genes.** (A, C) TAC peak pressure gradient and LV ejection fraction (EF) determined by echocardiography in WT (A) and *Slit3*<sup>-/-</sup> mice (C) after surgery (n=4-24 per group). (B, D) Transcript levels of *Col1a1*, *Col3a1*, *Nppa*, *Nppb*, and *Myh7* by real-time qPCR in WT mice in the LV before and at 1 and 3 weeks after TAC (B), as well as in the RV before and at 2 and 4 weeks after PAB (D) (n=6-8 per group). (E, F) Transcript levels of *Col1a1* and *Col3a1* by real-time qPCR in *Slit3*<sup>-/-</sup> and WT mice in the LV before and at 1 week after TAC (E), as well as in the RV before and at 2 weeks after PAB (F) (n=5-8 per group). (G) Linear regression analysis between aortic peak gradient and LV mass in *Slit3*<sup>-/-</sup> and WT mice at 3 and 21 days after TAC (n=54). BSL: 7-9 weeks old baseline mice before surgery. Data are presented as mean±SD. Number (n). \* $P < 0.05$ , \*\* $P < 0.01$  using the ordinary or Brown-Forsythe and Welch one-way ANOVA with Tamhane T2 multiple comparisons test (A-D), and two-way ANOVA with Tukey multiple comparisons test (E-F).

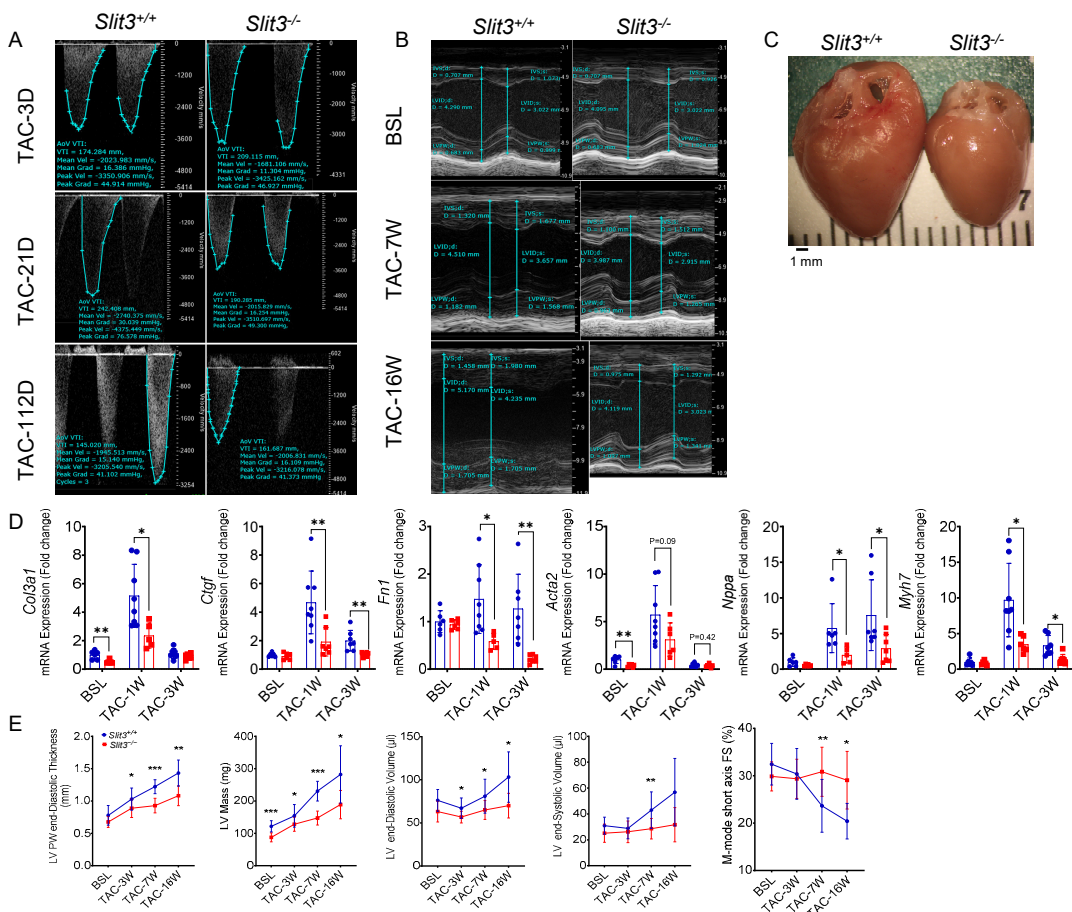

**Supplemental Figure 4. SLIT3 deficiency attenuates LV fibrosis and adverse remodeling.** (A) Representative images of TAC peak pressure gradient determined by echocardiography in *Slit3*<sup>-/-</sup> and WT mice at 3, 21, 112 days after surgery. (B) Representative images of M-mode parasternal short-axis echocardiogram in *Slit3*<sup>-/-</sup> and WT mice before and at 7 and 16 weeks after TAC. (C) Representative images of heart in *Slit3*<sup>-/-</sup> and WT mice at 1 year after TAC. (D) Transcript levels of *Col3a1*, *Ctgf*, *Fn1*, *Acta2*, *Nppa*, *Myh7* and in the LV by real-time qPCR in *Slit3*<sup>-/-</sup> and WT mice before and at 1 and 3 weeks after TAC (n=6-8 per group). (E) LV posterior wall end-diastolic thickness, mass, end-diastolic volume, end-systolic volume, and M-mode short axis fractional shortening (FS) determined by echocardiography in *Slit3*<sup>-/-</sup> and WT mice before and at 3, 7, and 16 weeks after TAC (n=6-8 per group). Scale bar, 1mm BSL: 7-9 weeks old baseline mice before surgery. Data are presented as mean±SD. Number (n). \*P < 0.05, \*\*P < 0.01, \*\*\*P < 0.001 vs. WT mice using the unpaired two-tailed Student's t-test.



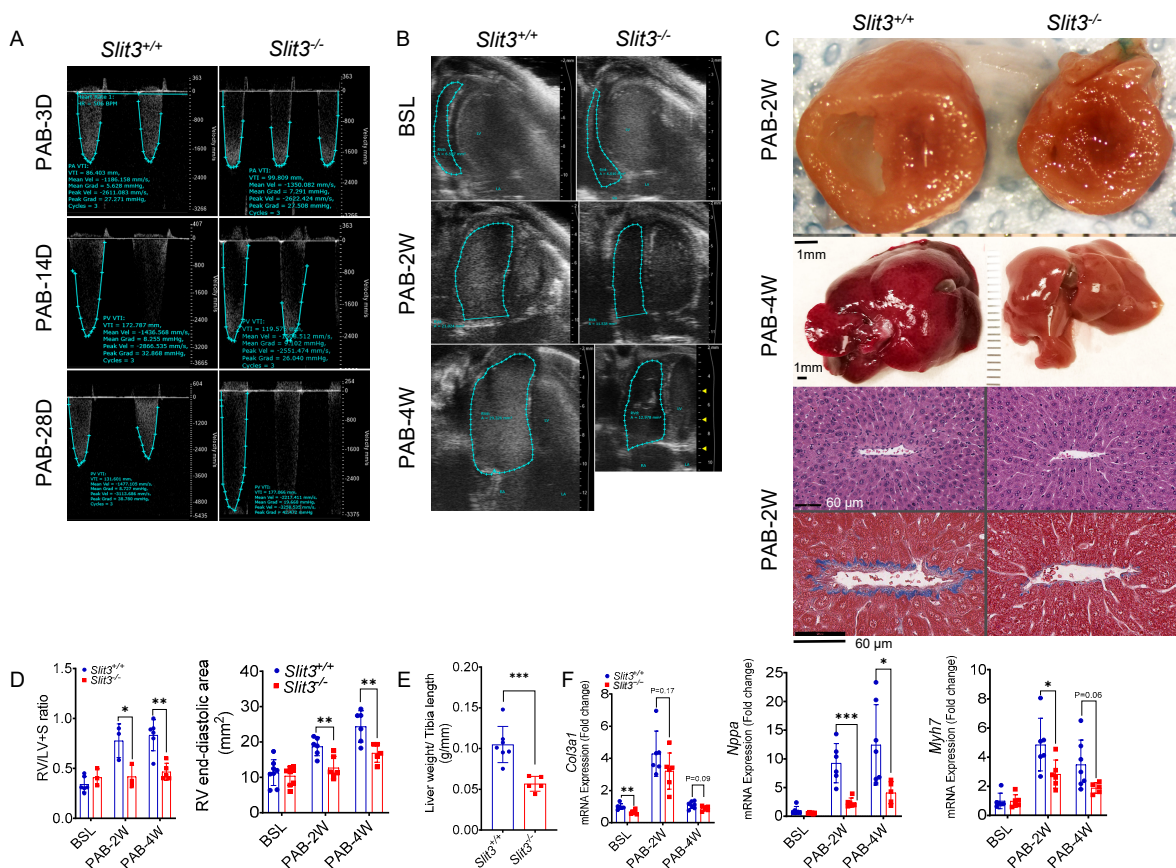

**Supplemental Figure 5. SLIT3 deficiency attenuates RV fibrosis and adverse remodeling.** (A) Representative images of PAB peak pressure gradient determined by echocardiography in *Slit3*<sup>-/-</sup> and WT mice at 3, 14 and 28 days after PAB. (B) Representative images of RV end-diastolic area determined by echocardiography in *Slit3*<sup>-/-</sup> and WT mice before and at 2 and 4 weeks after PAB. (C) Representative images of short-axis cross sectional view of the heart and liver morphology, and histological sections of central vein in liver tissue (third row, haematoxylin and eosin stain and fourth row, Masson's trichrome stain) in *Slit3*<sup>-/-</sup> and WT mice at 2 or 4 weeks after PAB. Scale bars, 1 mm and 60  $\mu$ m from top to bottom. (D) Quantification of right ventricular weight-to-left ventricular plus septum weight ratio (RV/LV+S) and RV end-diastolic area in *Slit3*<sup>-/-</sup> and WT mice before and at 2 and 4 weeks after PAB (n=3-7 per group). (E) Quantification of liver weight/ tibia length in *Slit3*<sup>-/-</sup> and WT mice at 4 weeks after PAB (n=5-7 per group). (F) Transcript levels of *Col3a1*, *Nppa*, and *Myh7* in the RV by real-time qPCR in *Slit3*<sup>-/-</sup> and WT mice before and at 2 and 4 weeks after PAB (n=6 per group). BSL: 7-9 weeks old baseline mice before surgery. Data are presented as mean  $\pm$  SD. Number (n). \*P < 0.05, \*\*P < 0.01, \*\*\*P < 0.001 vs. WT mice using the unpaired two-tailed Student's t-test.

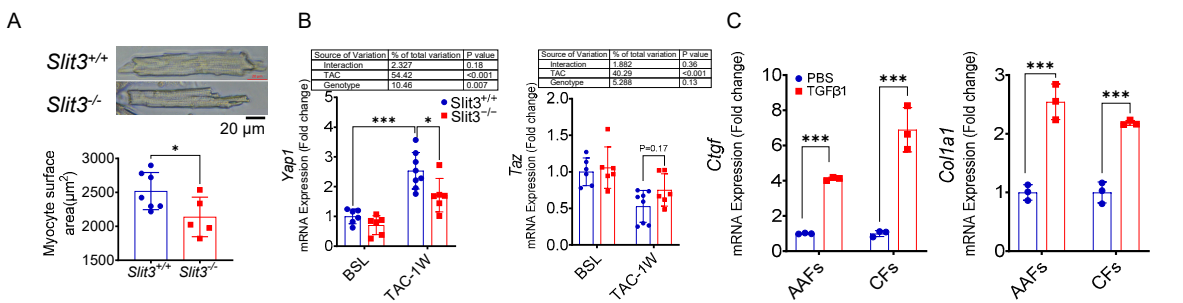

**Supplemental Figure 6. (A)** Representative microscopic images and quantification of isolated myocyte surface area in 8-12 weeks old, body weight close to 30g *Slit3*<sup>-/-</sup> and WT mice (n=5-7 per group). Scale bars, 20  $\mu$ m. **(B)** Transcript levels of *Yap1* and *Taz* in the LV by real-time qPCR in *Slit3*<sup>-/-</sup> and WT mice before and at 1 week after TAC (n=6-8 per group). **(C)** Transcript levels of *Ctgf* and *Col1a1* by real-time qPCR in WT AAFs and CFs cultured in PBS or TGF $\beta$ 1 (5.0 ng/ml) added collagen gel (1mg/ml collagen type I, 0.5% FBS) for 24 hours (n = 3 per group). Data are presented as mean $\pm$ SD. In vitro experiments were performed at least 3 times independently. \*P < 0.05, \*\*P < 0.01, \*\*\*P < 0.001 vs. WT mice or cells using the unpaired two-tailed Student's t-test (A, C), and two-way ANOVA with Tukey multiple comparisons test (B).

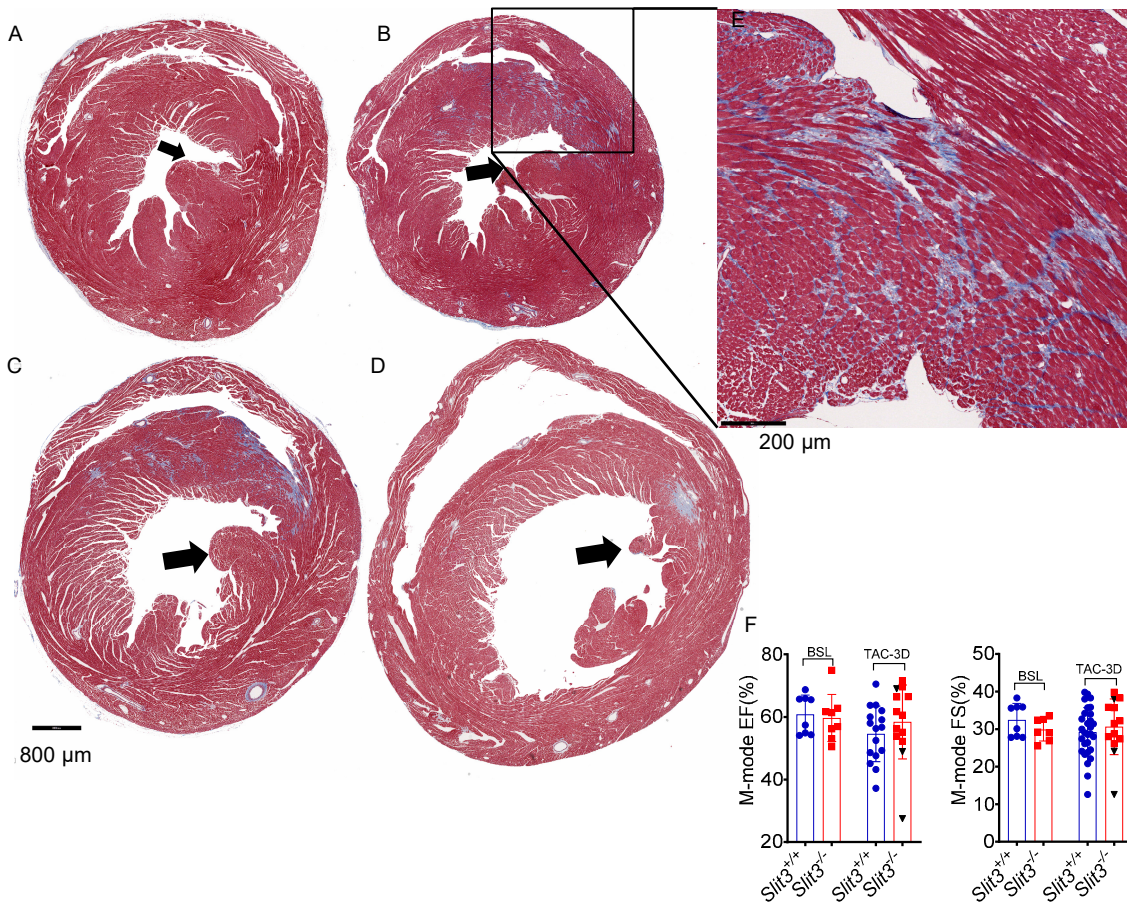

**Supplemental Figure 7.** (A-D) Representative histological transverse sections of whole heart (Masson's trichrome stain) in *Slit3*<sup>-/-</sup> mice at 3 (A-C) and 8 (D) weeks after transverse aortic constriction (TAC). The black arrows indicate the position of posteromedial papillary muscle (PPM). Scale bars, 800  $\mu$ m. (E) Higher-magnification view of the boxed area indicated in B. Scale bar, 200  $\mu$ m. (F) LV ejection fraction (EF) and fractional shortening (FS) determined by echocardiography in *Slit3*<sup>-/-</sup> and WT mice before and at day 3 after TAC. The three black triangles in *Slit3*<sup>-/-</sup> mice group represent three hearts with ventricular septal scars, as shown on the left. (n=8-16 per group). BSL: 7-9 weeks old baseline mice before surgery. Data are presented as mean $\pm$ SD. Number (n). Using the ordinary one-way ANOVA with Tamhane T2 multiple comparisons test (F).

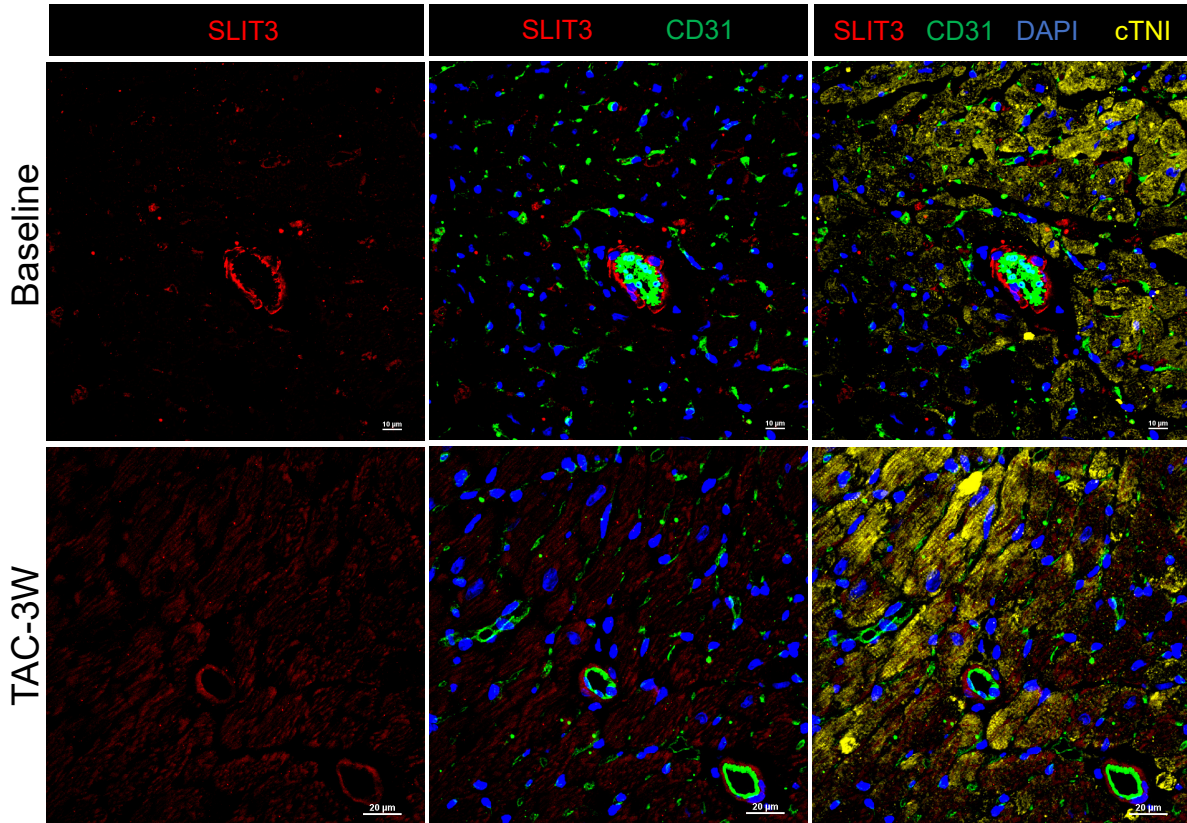

**Supplemental Figure 8.** Representative confocal immunofluorescence images of mouse cardiac tissue before and 3 weeks after TAC stained with SLIT3 (green), CD31 (green), DAPI (blue), and cTNI (yellow). (n=3 per group). Scale bars, 10  $\mu$ m and 20  $\mu$ m from top to bottom.



*Slit3*<sup>+/+</sup>

*Slit3*<sup>-/-</sup>

POSTN

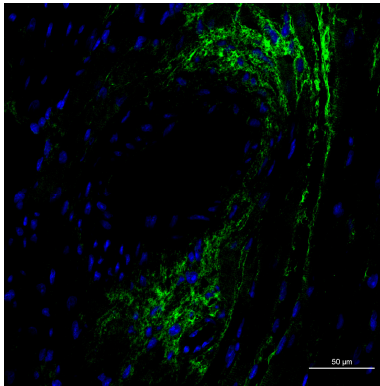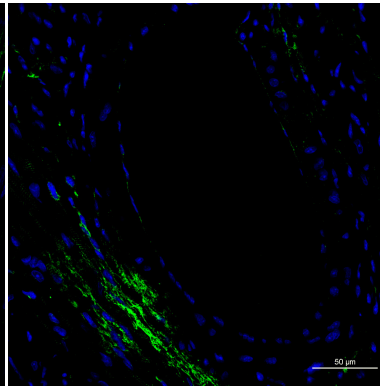

DAPI

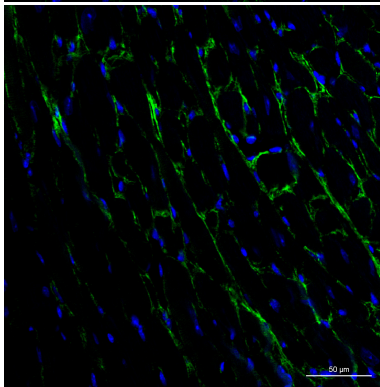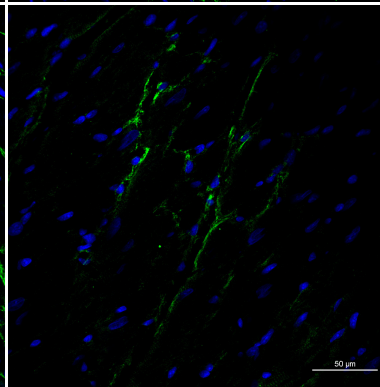

**Supplemental Figure 9.** Representative confocal immunofluorescence images of mouse cardiac tissue 8 weeks after TAC stained with POSTN (green) and DAPI (blue). (n=3 per group). Scale bars, 50  $\mu$ m.

Supplemental Table 1

| Sample                                                                                  | SLIT1     | SLIT2      | SLIT3       | ROBO1      | ROBO2     | ROBO3      | ROBO4     | COL1A1      | COL3A1      |
|-----------------------------------------------------------------------------------------|-----------|------------|-------------|------------|-----------|------------|-----------|-------------|-------------|
| Adipocyte - breast, donor1.CNhs11051.11376-118A8                                        | 0         | 2.5434973  | 185.6753037 | 16.3510541 | 3.8152459 | 1.6351054  | 0.1816784 | 7013.87551  | 4274.710586 |
| Adipocyte - breast, donor2.CNhs11969.11327-117E4                                        | 0         | 5.1384125  | 202.5390958 | 14.9870367 | 1.4987037 | 1.0705026  | 0.2141005 | 6510.796931 | 2677.541152 |
| Adipocyte - omental, donor1.CNhs11054.11473-119C6                                       | 0         | 3.6648145  | 200.578117  | 14.9411668 | 0.8457264 | 2.6781336  | 0         | 10972.31368 | 5847.775363 |
| Adipocyte - omental, donor2.CNhs12067.11474-119C7                                       | 0         | 6.004398   | 191.14      | 7.005131   | 9.006597  | 0          | 1.000733  | 7668.616858 | 3962.902615 |
| Adipocyte - omental, donor3.CNhs12068.11475-119C8                                       | 0         | 3.5756888  | 153.3076554 | 12.0679496 | 0         | 0.8939222  | 0         | 11880.67784 | 9302.601258 |
| Adipocyte - perirenal, donor1.CNhs12069.11476-119C9                                     | 0         | 0          | 186.6804441 | 3.4893541  | 0         | 1.744677   | 0         | 6781.559686 | 3375.950088 |
| Adipocyte - subcutaneous, donor1.CNhs12494.11259-116F8                                  | 0         | 0          | 30.395986   | 20.26399   | 0         | 0          | 0         | 10147.19312 | 2641.91773  |
| Adipocyte - subcutaneous, donor2.CNhs11371.11336-117F4                                  | 0         | 1.2634398  | 75.1746649  | 24.6370751 | 0         | 0.6317199  | 1.2634397 | 559.7038076 | 514.2199769 |
| Adipocyte - subcutaneous, donor3.CNhs12017.11408-118E4                                  | 0         | 1.8282994  | 243.6861913 | 13.0592814 | 0.2611856 | 2.3506706  | 0.5223713 | 367.4881787 | 805.2352918 |
| Alveolar Epithelial Cells, donor1.CNhs11325.11510-119G7                                 | 0         | 0.7372018  | 1.4744036   | 3.4402751  | 0.4914679 | 15.235504  | 1.7201376 | 464.1914059 | 70.77137    |
| Alveolar Epithelial Cells, donor2.CNhs12084.11590-120G6                                 | 0         | 0          | 0.6978012   | 2.7912047  | 0.6978012 | 27.2142455 | 3.4890058 | 275.6314614 | 2.093404    |
| Alveolar Epithelial Cells, donor3.CNhs12119.11671-122G6                                 | 0         | 0          | 3.129887    | 6.259774   | 3.129887  | 37.558644  | 9.389661  | 1968.698923 | 247.2611    |
| Amniotic Epithelial Cells, donor1.CNhs11341.11533-120A3                                 | 0         | 19.8781649 | 15.9462202  | 10.4851859 | 0         | 19.441282  | 0.2184414 | 769.1320717 | 1320.478095 |
| Amniotic Epithelial Cells, donor2.CNhs12098.11613-122A2                                 | 0         | 17.616304  | 28.186088   | 10.569783  | 0         | 14.093044  | 0         | 5122.821307 | 2660.061957 |
| Amniotic Epithelial Cells, donor3.CNhs12125.11694-123A2                                 | 0         | 5.539107   | 22.156427   | 6.066641   | 0         | 19.782524  | 0         | 5632.216287 | 2238.854111 |
| amniotic membrane cells, donor1.CNhs12502.12235-129G3                                   | 0         | 6.2073566  | 3.3424229   | 1.6712114  | 0.2387445 | 1.6712115  | 0.2387445 | 284.5834262 | 1303.306142 |
| amniotic membrane cells, donor2.CNhs12503.12236-129G4                                   | 0.2969647 | 12.7694813 | 4.4544703   | 6.2362584  | 0.2969647 | 4.4544702  | 0         | 517.9064035 | 5121.74985  |
| amniotic membrane cells, donor3.CNhs12379.12237-129G5                                   | 0         | 8.6004997  | 2.7644463   | 1.5358035  | 0         | 6.4503747  | 0         | 38.7022484  | 764.5229874 |
| Anulus Pulposus Cell, donor1.CNhs10876.11248-116E6                                      | 0         | 0.6188318  | 0.1237664   | 48.5164103 | 0.9901309 | 11.88157   | 0.8663645 | 1247.564838 | 1818.99409  |
| Anulus Pulposus Cell, donor2.CNhs12064.11463-119B5                                      | 0         | 0.6627948  | 4.970961    | 42.7502616 | 1.3255895 | 7.9535371  | 0.6627948 | 4748.2616   | 1769.993384 |
| Astrocyte - cerebellum, donor1.CNhs11321.11500-119F6                                    | 0.2462421 | 0.4924843  | 17.2369482  | 10.9577742 | 0.3693632 | 19.0837639 | 4.5554792 | 2629.8658   | 29.05657    |
| Astrocyte - cerebellum, donor2.CNhs12081.11580-120F5                                    | 0         | 0.4080014  | 17.3400588  | 11.6280394 | 0.2040007 | 25.9080878 | 8.3640284 | 6075.956588 | 17.95206    |
| Astrocyte - cerebellum, donor3.CNhs12117.11661-122F5                                    | 0.9403641 | 0.9403642  | 38.5549307  | 13.478553  | 0         | 21.9418306 | 4.388366  | 5789.195251 | 106.88806   |
| Astrocyte - cerebral cortex, donor1.CNhs10864.11235-116D2                               | 0         | 0          | 12.021912   | 40.073038  | 5.72472   | 7.728372   | 0         | 374.396673  | 41.217982   |
| Astrocyte - cerebral cortex, donor2.CNhs11960.11316-117D2                               | 0         | 0.2737489  | 16.424931   | 20.941787  | 1.2318698 | 5.8856002  | 0.1368744 | 365.5915897 | 6.8437212   |
| Astrocyte - cerebral cortex, donor3.CNhs12005.11392-118C6                               | 0         | 0          | 42.8100401  | 28.1215513 | 1.6320543 | 4.7706203  | 0.2510853 | 1161.520502 | 79.719576   |
| Basophils, donor3.CNhs12575.12243-129H2                                                 | 0.3096322 | 0.1548161  | 0.3096322   | 1.5481611  | 0.1548161 | 1.5481612  | 0.3096322 | 386.1114111 | 345.7044034 |
| Bronchial Epithelial Cell, donor1.CNhs11327.11511-119G8                                 | 0         | 0          | 5.2473245   | 6.371751   | 0         | 11.2442665 | 0         | 38.2305063  | 0           |
| Bronchial Epithelial Cell, donor2.CNhs12085.11591-120G7                                 | 0         | 0          | 2.39341     | 1.196705   | 1.196705  | 38.294558  | 0         | 186.68597   | 0           |
| Bronchial Epithelial Cell, donor3.CNhs12623.11672-122G7                                 | 0         | 0          | 0           | 27.37672   | 0         | 27.37672   | 0         | 36.5023     | 0           |
| Bronchial Epithelial Cell, donor4.CNhs12054.11453-119A4                                 | 0         | 0          | 2.7582636   | 4.597106   | 0         | 16.549582  | 0         | 20.2272668  | 0.9194212   |
| Bronchial Epithelial Cell, donor5.CNhs12058.11457-119A8                                 | 0         | 0          | 5.1205007   | 7.228942   | 0.6024118 | 22.289238  | 0.3012059 | 37.6507396  | 0           |
| Bronchial Epithelial Cell, donor6.CNhs12062.11461-119B3                                 | 0         | 0          | 5.916064    | 9.983358   | 0         | 12.94139   | 0         | 20.706224   | 0           |
| Bronchial Epithelial Cell, donor7.CNhs12642.11769-123I5                                 | 0         | 0.2498687  | 4.7475052   | 9.744879   | 0         | 17.9905458 | 0         | 25.2367379  | 0.4997374   |
| Cardiac Myocyte, donor1.CNhs12341.11525-119I4                                           | 0         | 2.438069   | 168.22674   | 39.009099  | 0         | 9.752275   | 0         | 10047.28096 | 965.475191  |
| Cardiac Myocyte, donor2.CNhs12350.11605-120I3                                           | 0         | 0          | 14.7554191  | 32.1936413 | 0.6707009 | 7.3777095  | 8.7191112 | 3774.033738 | 2109.354204 |
| Cardiac Myocyte, donor3.CNhs12571.11686-122I3                                           | 0         | 2.1736636  | 50.1221242  | 17.6450336 | 0.3835877 | 8.8225168  | 9.7175547 | 4554.208728 | 2453.298974 |
| CD14+ monocyte derived endothelial progenitor cells, donor1.CNhs10858.11229-116C5       | 0         | 0          | 0           | 0          | 0         | 0.4478309  | 0         | 0           | 0           |
| CD14+ monocyte derived endothelial progenitor cells, donor2.CNhs11897.11310-117C5       | 0         | 0          | 0           | 0.3238937  | 0         | 0.6477873  | 0         | 0           | 0           |
| CD14+ monocyte derived endothelial progenitor cells, donor3.CNhs11904.11386-118B9       | 0         | 0          | 0           | 1.803029   | 0         | 2.0606045  | 0         | 0.2575756   | 0           |
| CD14+ monocytes - mock treated, donor1.CNhs13468.11863-125A9                            | 0         | 0          | 0           | 0          | 0         | 0.4361946  | 0         | 0.1453982   | 0.1453982   |
| CD14+ monocytes - mock treated, donor2.CNhs13484.11873-125C1                            | 0         | 0          | 0           | 0.3778759  | 0         | 0.3778759  | 0         | 0           | 0           |
| CD14+ monocytes - mock treated, donor3.CNhs13491.11883-125D2                            | 0         | 0          | 0           | 0          | 0         | 0.2425841  | 0         | 0           | 0           |
| CD14+ monocytes - treated with BCG, donor1.CNhs13465.11860-125A6                        | 0         | 0          | 0           | 0          | 0         | 0.5753848  | 0         | 0           | 0           |
| CD14+ monocytes - treated with BCG, donor2.CNhs13475.11870-125B7                        | 0         | 0          | 0.2561607   | 0.2561607  | 0         | 0          | 0         | 2.0492856   | 0.7684821   |
| CD14+ monocytes - treated with BCG, donor3.CNhs13543.11880-125C8                        | 0         | 0          | 0           | 0          | 0         | 0.4729645  | 0         | 0           | 0           |
| CD14+ monocytes - treated with B-glucan, donor1.CNhs13474.11869-125B6                   | 0         | 0          | 0           | 0.232429   | 0.232429  | 0.9297161  | 0         | 0.232429    | 0           |
| CD14+ monocytes - treated with B-glucan, donor2.CNhs13489.11879-125C7                   | 0         | 0          | 0           | 0          | 0         | 0          | 0         | 0.4111679   | 0           |
| CD14+ monocytes - treated with B-glucan, donor3.CNhs13495.11889-125D8                   | 0         | 0          | 0           | 0          | 0         | 0.3097064  | 0.3097064 | 0           | 0           |
| CD14+ monocytes - treated with Candida, donor1.CNhs13473.11868-125B5                    | 0         | 0          | 0           | 0          | 0         | 0.3447457  | 0         | 0.6894914   | 0           |
| CD14+ monocytes - treated with Candida, donor2.CNhs13488.11878-125C6                    | 0         | 0          | 0           | 0          | 0         | 1.2909694  | 0         | 1.2909694   | 0           |
| CD14+ monocytes - treated with Candida, donor3.CNhs13494.11888-125D7                    | 0         | 0          | 0           | 0          | 0         | 1.354265   | 0         | 0           | 0           |
| CD14+ monocytes - treated with Cryptococcus, donor1.CNhs13472.11867-125B4               | 0         | 0          | 0           | 0          | 0         | 1.5059388  | 0         | 0.5647269   | 0           |
| CD14+ monocytes - treated with Cryptococcus, donor2.CNhs13487.11877-125C5               | 0         | 0          | 0.2729062   | 0          | 0         | 0          | 0         | 0.2729062   | 0           |
| CD14+ monocytes - treated with Cryptococcus, donor3.CNhs13546.11887-125D6               | 0         | 0          | 0           | 0          | 0         | 0          | 0         | 0.449447    | 0           |
| CD14+ monocytes - treated with Group A streptococci, donor1.CNhs13469.11864-125B1       | 0         | 0          | 0           | 0          | 0         | 0.6121678  | 0         | 0.9182517   | 0           |
| CD14+ monocytes - treated with Group A streptococci, donor2.CNhs13532.11874-125C2       | 0         | 0          | 0           | 0.320929   | 0         | 0.320929   | 0         | 0           | 0           |
| CD14+ monocytes - treated with Group A streptococci, donor3.CNhs13492.11884-125D3       | 0         | 0          | 0           | 0          | 0         | 0.6393371  | 0         | 0.6393371   | 0           |
| CD14+ monocytes - treated with IFN + N-hexane, donor1.CNhs13466.11861-125A7             | 0         | 0          | 0           | 0          | 0         | 0          | 0         | 0           | 0           |
| CD14+ monocytes - treated with IFN + N-hexane, donor2.CNhs13476.11871-125B8             | 0         | 0          | 0           | 0.3989273  | 0         | 0.3989274  | 0         | 0.1994637   | 0           |
| CD14+ monocytes - treated with IFN + N-hexane, donor3.CNhs13490.11881-125C9             | 0         | 0          | 0           | 0          | 0         | 0          | 0         | 0           | 0           |
| CD14+ monocytes - treated with lipopolysaccharide, donor1.CNhs13470.11865-125B2         | 0.6053995 | 0.6053995  | 10.897191   | 3.0269975  | 1.210799  | 1.210799   | 1.210799  | 461.3144209 | 252.4516    |
| CD14+ monocytes - treated with lipopolysaccharide, donor2.CNhs13533.11875-125C3         | 0         | 0          | 0           | 0.3682776  | 0         | 0.3682776  | 0         | 0           | 0           |
| CD14+ monocytes - treated with lipopolysaccharide, donor3.CNhs13545.11885-125D4         | 0         | 0          | 0           | 0.3164624  | 0         | 0.3164624  | 0         | 0.3164624   | 0.3164624   |
| CD14+ monocytes - treated with Salmonella, donor1.CNhs13471.11866-125B3                 | 0         | 0          | 0           | 0          | 0         | 1.7412554  | 0         | 0           | 0.2902092   |
| CD14+ monocytes - treated with Salmonella, donor2.CNhs13485.11876-125C4                 | 0         | 0          | 0           | 0.5673852  | 0         | 0          | 0         | 0.5673852   | 0           |
| CD14+ monocytes - treated with Salmonella, donor3.CNhs13493.11886-125D5                 | 0         | 0          | 0           | 0          | 0         | 0          | 0         | 1.8684667   | 0           |
| CD14+ monocytes - treated with Trehalose dimycolate (TDM), donor1.CNhs13467.11862-125A8 | 0         | 0          | 0           | 0          | 0         | 1.7587407  | 0         | 0           | 0           |
| CD14+ monocytes - treated with Trehalose dimycolate (TDM), donor2.CNhs13483.11872-125B9 | 0         | 0          | 0           | 1.0429658  | 0         | 0.5214829  | 0         | 0.5214829   | 0           |
| CD14+ monocytes - treated with Trehalose dimycolate (TDM), donor3.CNhs13544.11882-125D1 | 0         | 0          | 0           | 0          | 0         | 0.6515665  | 0         | 0           | 0           |
| CD14+ Monocytes, donor1.CNhs10852.11224-116B9                                           | 0         | 0          | 0           | 0          | 0         | 0.5539954  | 0.5539954 | 54.8455453  | 40.9956602  |
| CD14+ Monocytes, donor2.CNhs11954.11305-117B9                                           | 0         | 0          | 0           | 0.4010889  | 0         | 1.4038111  | 0         | 0.2005444   | 0           |
| CD14+ Monocytes, donor3.CNhs11997.11381-118B4                                           | 0         | 0          | 0           | 0.2170109  | 0         | 1.9530978  | 0         | 3.4721739   | 0.8680435   |
| CD14+CD16- Monocytes, donor1.CNhs13224.11788-124B6                                      | 0         | 0          | 0           | 0          | 0         | 0.7863003  | 0         | 0.1123286   | 0           |
| CD14+CD16- Monocytes, donor2.CNhs13216.11799-124C8                                      | 0         | 0          | 0           | 0          | 0.1501769 | 1.501769   | 0         | 0           | 0.3003538   |
| CD14+CD16- Monocytes, donor3.CNhs13540.11910-125G2                                      | 0         | 0          | 0           | 0.3214512  | 0.1607256 | 0.8036279  | 0         | 0           | 0           |
| CD14+CD16+ Monocytes, donor1.CNhs13541.11789-124B7                                      | 0         | 0          | 0           | 0.2112553  | 0         | 0.4225106  | 0         | 0           | 0           |
| CD14+CD16+ Monocytes, donor2.CNhs13208.11801-124D1                                      | 0         | 0          | 0           | 0          | 0         | 1.0630215  | 0         | 0           | 0           |
| CD14+CD16+ Monocytes, donor3.CNhs13549.11912-125G4                                      | 0         | 0          | 0           | 0.4193173  | 0         | 0.2096586  | 0         | 0           | 0           |
| CD14-CD16+ Monocytes, donor2.CNhs13207.11800-124C9                                      | 0         | 0          | 0           | 0          | 0         | 0.1989167  | 0         | 0           | 0.1989167   |
| CD14-CD16+ Monocytes, donor3.CNhs13548.11911-125G3                                      | 0         | 0          | 0           | 0          | 0         | 0.5479925  | 0.1826642 | 0           | 0           |
| CD19+ B Cells, donor1.CNhs12343.11544-120B5                                             | 0         | 0          | 0           | 0          | 0         | 0.569213   | 0         | 7.399769    | 0           |
| CD19+ B Cells, donor2.CNhs12352.11624-122B4                                             | 0         | 0          | 0           | 1.174474   | 0         | 0          | 0         | 10.5702695  | 0           |
| CD19+ B Cells, donor3.CNhs12354.11705-123B4                                             | 0         | 0          | 0           | 0.3822732  | 0         | 1.1468197  | 0         | 13.379563   | 0           |
| CD34 cells differentiated to erythrocyte lineage, biol_rep1.CNhs13552.11931-125I5       | 0.2192599 | 0          | 0           | 0.2192599  | 0         | 0.2192599  | 0         | 0           | 0           |
| CD34 cells differentiated to erythrocyte lineage, biol_rep2.CNhs13553.11932-125I6       | 0         | 0          | 0           | 0.5228709  | 0         | 0          | 0         | 0           | 0           |
| CD34+ stem cells - adult bone marrow derived, donor1, tech_rep1.CNhs12588.12225-129F2   | 0         | 0          | 0           | 1.8436886  | 0         | 13.9593566 | 6.057834  | 0.7901523   | 0.2633841   |
| CD4+ T Cells, donor1.CNhs10853.11225-116C1                                              | 0         | 0          | 0           | 0          | 0         | 3.3440661  | 0         | 5.114454    | 0           |
| CD4+ T Cells, donor2.CNhs11955.11306-117C1                                              | 0         | 0          | 0.3930108   | 0          | 0         | 2.7510754  | 0         | 5.895162    | 0           |
| CD4+ T Cells, donor3.CNhs11998.11382-118B5                                              | 0         | 0          | 0           | 0          | 0         | 1.644812   | 0         | 10.280075   | 0           |
| CD4+CD25+CD45RA- memory regulatory T cells expanded, donor1.CNhs13204.11794-124C3       | 0         | 0          | 0.1114105   | 0          | 0.1114105 | 1.1141047  | 0         | 0.1114105   | 0           |
| CD4+CD25+CD45RA- memory regulatory T cells expanded, donor2.CNhs13811.11916-125G8       | 0         | 0          | 0           | 0          | 0         | 0.1280913  | 0         | 0.5123653   | 0           |
| CD4+CD25+CD45RA- memory regulatory T cells expanded, donor3.CNhs13812.11920-125H3       | 0         | 0          | 0           | 0          | 0         | 0.390178   | 0         | 0.1300593   | 0           |
| CD4+CD25+CD45RA- memory regulatory T cells, donor1.CNhs13195.11782-124A9                | 0         | 0          | 0           | 0          | 0         | 0.8838177  | 0         | 2.3568473   | 0           |
| CD4+CD25+CD45RA- memory regulatory T cells, donor2.CNhs                                 |           |            |             |            |           |            |           |             |             |



|                                                                                      |           |            |             |            |            |            |            |             |             |
|--------------------------------------------------------------------------------------|-----------|------------|-------------|------------|------------|------------|------------|-------------|-------------|
| CD4+CD25+CD45RA- memory regulatory T cells, donor3.CNhs13538.11908-125F9             | 0         | 0          | 0           | 0          | 0.2708039  | 0.2708039  | 0          | 0           | 0           |
| CD4+CD25+CD45RA+ naive regulatory T cells expanded, donor1.CNhs13203.11793-124C2     | 0         | 0          | 0           | 0          | 0          | 0.8359325  | 0          | 0           | 0           |
| CD4+CD25+CD45RA+ naive regulatory T cells expanded, donor2.CNhs13918.11915-125G7     | 0         | 0          | 0           | 0          | 0          | 0.2887268  | 0          | 0           | 0           |
| CD4+CD25+CD45RA+ naive regulatory T cells expanded, donor3.CNhs13919.11919-125H2     | 0         | 0          | 0           | 0          | 0          | 1.2983651  | 0          | 0           | 0.1854807   |
| CD4+CD25+CD45RA+ naive regulatory T cells, donor3.CNhs13513.11907-125F8              | 0         | 0          | 0           | 0          | 0          | 7.793069   | 0          | 1.948267    | 0           |
| CD4+CD25-CD45RA- memory conventional T cells expanded, donor1.CNhs13215.11792-124C1  | 0         | 0          | 0           | 0.1133093  | 0          | 1.1330934  | 0          | 0.1133093   | 0           |
| CD4+CD25-CD45RA- memory conventional T cells expanded, donor2.CNhs13920.11914-125G6  | 0         | 0          | 0           | 0          | 0          | 0          | 0          | 0           | 0.1569161   |
| CD4+CD25-CD45RA- memory conventional T cells expanded, donor3.CNhs13921.11918-125H1  | 0         | 0          | 0           | 0          | 0          | 1.1803258  | 0          | 0.1475407   | 0           |
| CD4+CD25-CD45RA- memory conventional T cells, donor3.CNhs13539.11909-125G1           | 0         | 0          | 0           | 0          | 0          | 3.7952954  | 0          | 0.7590591   | 0           |
| CD4+CD25-CD45RA+ naive conventional T cells expanded, donor1.CNhs13202.11791-124B9   | 0         | 0          | 0           | 0          | 0          | 2.0286216  | 0          | 0           | 0           |
| CD4+CD25-CD45RA+ naive conventional T cells expanded, donor2.CNhs13813.11913-125G5   | 0         | 0          | 0           | 0          | 0          | 0.1644379  | 0          | 0.3288758   | 0           |
| CD4+CD25-CD45RA+ naive conventional T cells expanded, donor3.CNhs13814.11917-125G9   | 0         | 0          | 0           | 0          | 0          | 1.1054001  | 0          | 0.27635     | 0           |
| CD4+CD25-CD45RA+ naive conventional T cells, donor1.CNhs13223.11784-124B2            | 0         | 0          | 0           | 0          | 0          | 8.0074745  | 0          | 2.372585    | 0           |
| CD4+CD25-CD45RA+ naive conventional T cells, donor2.CNhs13205.11795-124C4            | 0         | 0          | 0           | 0          | 0          | 6.1534391  | 0          | 1.3377041   | 0           |
| CD4+CD25-CD45RA+ naive conventional T cells, donor3.CNhs13512.11906-125F7            | 0         | 0          | 0           | 0          | 0          | 11.498907  | 0          | 3.136066    | 0           |
| CD8+ T Cells, donor1.CNhs10854.11226-116C2                                           | 0         | 0          | 0           | 0.4032134  | 0          | 3.6289214  | 0          | 2.4192808   | 0           |
| CD8+ T Cells, donor2.CNhs11956.11307-117C2                                           | 0         | 0          | 0           | 0          | 0          | 2.9418422  | 0          | 2.674402    | 0           |
| CD8+ T Cells, donor3.CNhs11999.11383-118B6                                           | 0         | 0          | 0           | 1.5930684  | 0          | 5.7929761  | 0          | 5.0688541   | 0           |
| Chondrocyte - de diff, donor1.CNhs11923.11261-116G1                                  | 0         | 0          | 28.5536932  | 13.3732486 | 0          | 5.0601482  | 0          | 6206.633125 | 1230.700314 |
| Chondrocyte - de diff, donor2.CNhs11372.11338-117F6                                  | 0         | 0          | 38.1016811  | 13.034786  | 0          | 6.016056   | 0          | 9316.362393 | 3263.20846  |
| Chondrocyte - de diff, donor3.CNhs12020.11410-118E6                                  | 0         | 0.4345396  | 33.8940855  | 12.8913402 | 0.1448465  | 8.9804843  | 0.1448465  | 5012.124095 | 1498.147546 |
| Chondrocyte - re diff, donor2.CNhs11373.11339-117F7                                  | 0         | 0          | 0           | 19.8821487 | 0.7952859  | 1.5905718  | 0          | 8566.820221 | 6791.741989 |
| Chondrocyte - re diff, donor3.CNhs12021.11411-118E7                                  | 0         | 0          | 7.299523    | 18.4921251 | 0.4866349  | 3.4064441  | 0.4866349  | 9526.364221 | 8747.261793 |
| chorionic membrane cells, donor1.CNhs12504.12238-129G6                               | 0         | 2.8710105  | 7.6560279   | 3.1900116  | 0.3190012  | 0.9570035  | 5.742021   | 236.3798602 | 552.8290098 |
| chorionic membrane cells, donor2.CNhs12506.12239-129G7                               | 0         | 0.27479278 | 2.10674464  | 10.7169184 | 1.09917111 | 3.29751335 | 0          | 4308.567252 | 1307.189256 |
| chorionic membrane cells, donor3.CNhs12380.12240-129G8                               | 0         | 0          | 10.1276607  | 1.0660696  | 1.0660696  | 1.5991043  | 14.9249738 | 81.5543212  | 73.0257644  |
| Ciliary Epithelial Cells, donor1.CNhs10871.11242-116D9                               | 0         | 3.97046232 | 12.38406107 | 19.0014983 | 0.18906963 | 16.543593  | 1.13441781 | 852.9876553 | 2.36337     |
| Ciliary Epithelial Cells, donor2.CNhs11966.11323-117D9                               | 0         | 2.4390234  | 9.7560935   | 22.1729398 | 0.2217294  | 13.7472226 | 1.108647   | 2929.26707  | 7.31707     |
| Ciliary Epithelial Cells, donor3.CNhs12009.11399-118D4                               | 0         | 1.49319136 | 11.41852215 | 25.1207487 | 0.43917393 | 12.6482091 | 0.96618264 | 2674.481075 | 24.41807043 |
| Corneal Epithelial Cells, donor1.CNhs11336.11526-119I5                               | 0         | 0          | 9.4716776   | 10.5645634 | 0.3642953  | 16.7575833 | 0          | 17.4861739  | 0           |
| Corneal Epithelial Cells, donor2.CNhs12094.11606-120I4                               | 0         | 0          | 0           | 5.410587   | 0          | 2.705294   | 0          | 16.231762   | 0           |
| Corneal Epithelial Cells, donor3.CNhs12123.11687-122I4                               | 0         | 0          | 3.33706     | 6.3033356  | 0          | 7.0449043  | 0          | 15.943731   | 0           |
| Dendritic Cells - monocyte immature derived, donor1, tech_rep1.CNhs10855.11227-116C3 | 0         | 0          | 0           | 0.6490948  | 0          | 3.5700214  | 0.6490948  | 0           | 0           |
| Dendritic Cells - monocyte immature derived, donor1, tech_rep2.CNhs11062.11227-116C3 | 0         | 0          | 0           | 0.5223892  | 0          | 1.9154271  | 0.6965189  | 0           | 0.1741297   |
| Dendritic Cells - monocyte immature derived, donor3.CNhs12000.11384-118B7            | 0         | 0          | 0           | 0.5318319  | 0          | 3.323949   | 0.3988739  | 4.254655    | 1.595496    |
| Dendritic Cells - plasmacytoid, donor1.CNhs10857.11228-116C4                         | 0         | 0          | 0           | 0          | 0          | 2.3849062  | 0          | 0.2384906   | 0           |
| Endothelial Cells - Aortic, donor0.CNhs10837.11207-116A1                             | 0         | 0.3975248  | 0.1987624   | 2.3851488  | 0          | 9.1430707  | 374.269613 | 0.3975248   | 0.3975248   |
| Endothelial Cells - Aortic, donor1.CNhs12495.11263-116G3                             | 0         | 0.8602346  | 2.5807038   | 6.8818768  | 0          | 6.8818768  | 331.190319 | 148.820585  | 18.92516    |
| Endothelial Cells - Aortic, donor2.CNhs11375.11340-117F8                             | 0         | 0.3471405  | 0.694281    | 1.7357025  | 0          | 7.2899505  | 591.180274 | 0           | 0           |
| Endothelial Cells - Aortic, donor3.CNhs12022.11412-118E8                             | 0         | 2.82654    | 5.65308     | 4.5224635  | 0          | 10.1755429 | 382.713477 | 0           | 0           |
| Endothelial Cells - Artery, donor1.CNhs12496.11264-116G4                             | 0         | 4.6144938  | 2.936496    | 5.0339932  | 0.4194994  | 15.1019797 | 407.753452 | 0.4194994   | 0           |
| Endothelial Cells - Artery, donor2.CNhs11977.11341-117F9                             | 0         | 4.1267706  | 0.275118    | 5.2272428  | 0          | 11.5549577 | 428.909027 | 0           | 0           |
| Endothelial Cells - Artery, donor3.CNhs12023.11413-118E9                             | 0         | 1.2539698  | 2.2989446   | 1.6719598  | 0          | 10.0317585 | 437.21747  | 2.92593     | 0.8359799   |
| Endothelial Cells - Lymphatic, donor1.CNhs10865.11236-116D3                          | 0         | 0.2584168  | 0           | 0.2584168  | 0          | 5.1683353  | 312.167445 | 0           | 0           |
| Endothelial Cells - Lymphatic, donor2.CNhs11901.11317-117D3                          | 0         | 1.778831   | 0           | 3.5576626  | 0          | 11.3845205 | 330.862624 | 21.3459758  | 0.7115325   |
| Endothelial Cells - Lymphatic, donor3.CNhs11906.11393-118C7                          | 0         | 0.6694412  | 0.6694412   | 1.3388824  | 0          | 9.7068977  | 421.413252 | 35.1456642  | 0.3347206   |
| Endothelial Cells - Microvascular, donor1.CNhs11925.11265-116G5                      | 0         | 0          | 0           | 0          | 0          | 7.2509277  | 588.130803 | 0           | 0           |
| Endothelial Cells - Microvascular, donor2.CNhs11376.11342-117G1                      | 0         | 0          | 0           | 0          | 0          | 3.0410884  | 465.286529 | 0.7602721   | 0           |
| Endothelial Cells - Microvascular, donor3.CNhs12024.11414-118F1                      | 0         | 0          | 0.7321862   | 0.7321862  | 0          | 10.7387305 | 693.86843  | 42.2227365  | 9.030296    |
| Endothelial Cells - Thoracic, donor1.CNhs11926.11266-116G6                           | 0         | 0.3676631  | 0           | 1.4706523  | 0          | 9.9269032  | 304.057367 | 0           | 0.3676631   |
| Endothelial Cells - Thoracic, donor2.CNhs11978.11343-117G2                           | 0         | 0.8101419  | 2.430426    | 2.4304258  | 0          | 17.8231228 | 446.388213 | 37.2665292  | 2.430426    |
| Endothelial Cells - Umbilical vein, donor1.CNhs10872.11243-116E1                     | 0         | 0.71439783 | 0.17859946  | 13.3949592 | 0          | 11.4303652 | 218.427135 | 0.71439783  | 1.875294    |
| Endothelial Cells - Umbilical vein, donor2.CNhs11967.11324-117E1                     | 0         | 0          | 0.2245294   | 8.9811751  | 0.4490588  | 17.0642323 | 247.431369 | 2.918882    | 0.8981175   |
| Endothelial Cells - Umbilical vein, donor3.CNhs12010.11400-118D5                     | 0         | 0.225223   | 0.1126115   | 10.5854793 | 0          | 9.2341414  | 203.263722 | 1.2387263   | 1.238726    |
| Endothelial Cells - Vein, donor1.CNhs12497.11267-116G7                               | 0         | 0          | 1.533166    | 3.066333   | 0          | 18.397996  | 614.799716 | 0           | 0           |
| Endothelial Cells - Vein, donor2.CNhs11377.11344-117G3                               | 0         | 0.9492657  | 0           | 8.5433909  | 0          | 7.5941254  | 517.349784 | 0           | 0           |
| Endothelial Cells - Vein, donor3.CNhs12026.11416-118F3                               | 0.1832017 | 0.1832017  | 1.2824122   | 5.679254   | 0          | 7.1448679  | 398.09739  | 70.3494693  | 16.1217534  |
| Esophageal Epithelial Cells, donor1.CNhs11323.11507-119G4                            | 0         | 0          | 5.2331286   | 4.7970346  | 0          | 22.2407967 | 0          | 53.6395687  | 0.4360941   |
| Esophageal Epithelial Cells, donor2.CNhs12083.11587-120G3                            | 0         | 0          | 18.619725   | 0          | 0          | 18.619725  | 0          | 93.098625   | 0           |
| Esophageal Epithelial Cells, donor3.CNhs12622.11668-122G3                            | 0         | 0          | 0           | 0          | 0          | 24.69834   | 0          | 98.79335    | 0           |
| Fibroblast - Aortic Adventitial, donor1.CNhs10874.11245-116E3                        | 0         | 4.432068   | 79.777222   | 10.7635935 | 0          | 8.6108748  | 2.4059798  | 3966.194256 | 943.5239423 |
| Fibroblast - Aortic Adventitial, donor2.CNhs11968.11326-117E3                        | 0         | 3.6052077  | 116.5203136 | 16.4397472 | 0.1442083  | 6.7777904  | 2.8841661  | 10180.38557 | 2346.269186 |
| Fibroblast - Aortic Adventitial, donor3.CNhs12011.11401-118D6                        | 0         | 5.3200257  | 82.9924014  | 12.7680617 | 0          | 4.2560207  | 4.6106889  | 5570.421611 | 1356.251894 |
| Fibroblast - Cardiac, donor1.CNhs12498.11268-116G8                                   | 0         | 1.1213552  | 105.9680664 | 17.3810056 | 0.5606776  | 5.0460984  | 1.6820328  | 5614.06481  | 1314.228296 |
| Fibroblast - Cardiac, donor2.CNhs11378.11345-117G4                                   | 0         | 1.06749    | 9.60741     | 37.36215   | 0          | 8.53992    | 25.61976   | 5875.46475  | 1267.11058  |
| Fibroblast - Cardiac, donor3.CNhs12027.11417-118F4                                   | 0         | 0.2466675  | 36.2601295  | 47.8535044 | 0          | 8.3866965  | 0.4933351  | 11150.85319 | 638.6222828 |
| Fibroblast - Cardiac, donor4.CNhs11909.11452-119A3                                   | 0         | 0.311211   | 114.836872  | 42.9471228 | 0.622422   | 8.402698   | 1.8672662  | 2805.878695 | 1896.129896 |
| Fibroblast - Cardiac, donor5.CNhs12057.11456-119A7                                   | 0         | 3.5024775  | 6.3314016   | 23.5743676 | 0          | 14.9528846 | 27.0768451 | 2723.84979  | 2867.986875 |
| Fibroblast - Cardiac, donor6.CNhs12061.11460-119B2                                   | 0         | 1.7980809  | 5.2307809   | 23.0481283 | 0          | 9.3173284  | 26.1539045 | 1594.897788 | 1513.493761 |
| Fibroblast - Choroid Plexus, donor1.CNhs11319.11492-119E7                            | 0         | 0.7567871  | 5.6002249   | 26.4875499 | 5.1461524  | 11.9572368 | 0.6054297  | 7273.7839   | 4594.606073 |
| Fibroblast - Choroid Plexus, donor2.CNhs12344.11572-120E6                            | 0         | 0          | 3.4570555   | 39.7561387 | 4.6094073  | 6.3379351  | 1.1523518  | 16160.58658 | 2201.568207 |
| Fibroblast - Choroid Plexus, donor3.CNhs12620.11653-122E6                            | 0         | 1.468019   | 5.872076    | 26.424342  | 2.936038   | 23.488304  | 5.872076   | 5029.432971 | 273.051527  |
| Fibroblast - Conjunctival, donor1.CNhs11339.11531-120A1                              | 0         | 3.7491429  | 53.6596079  | 15.9338573 | 0.7029643  | 44.989715  | 5.1550715  | 1002.895728 | 534.4871861 |
| Fibroblast - Conjunctival, donor3.CNhs12734.11692-122I9                              | 0         | 2.9817168  | 157.6802022 | 35.9559972 | 2.4555315  | 8.5943602  | 0.5261853  | 3648.744436 | 4925.094639 |
| Fibroblast - Dermal, donor1.CNhs12499.11269-116G9                                    | 0         | 1.2486403  | 14.0472035  | 15.6080038 | 0          | 7.4918419  | 1.8729605  | 402.6864995 | 71.4846576  |
| Fibroblast - Dermal, donor2.CNhs11379.11346-117G5                                    | 0         | 1.7114155  | 4.5637745   | 9.6980211  | 0          | 6.8456618  | 56.4767103 | 300.0681778 | 41.644443   |
| Fibroblast - Dermal, donor3.CNhs12028.11418-118F5                                    | 0         | 5.0812552  | 14.0481761  | 15.8415601 | 0.1494487  | 6.8746394  | 1.6439355  | 592.5640183 | 136.8949913 |
| Fibroblast - Dermal, donor4.CNhs12052.11450-119A1                                    | 0         | 1.9963865  | 16.9105679  | 16.4408299 | 1.5266485  | 6.8112009  | 2.9358625  | 595.745212  | 276.7931133 |
| Fibroblast - Dermal, donor5.CNhs12055.11454-119A5                                    | 0         | 2.1043482  | 19.2628803  | 16.6729133 | 6.7986637  | 5.5036801  | 0.9712377  | 677.1145259 | 272.4321654 |
| Fibroblast - Dermal, donor6.CNhs12059.11458-119A9                                    | 0         | 2.3876637  | 16.2922935  | 18.2586048 | 5.056229   | 4.9157782  | 1.1236064  | 685.1190347 | 191.5749003 |
| Fibroblast - Gingival, donor1.CNhs10866.11237-116D4                                  | 0         | 0.4083083  | 11.8409421  | 33.4812842 | 10.820171  | 6.9412419  | 1.4290792  | 1099.778521 | 356.0448747 |
| Fibroblast - Gingival, donor10 (periodontitis).CNhs14135.11928-125I2                 | 0         | 4.7186323  | 51.3806636  | 31.9818417 | 126.616636 | 11.2722885 | 3.9321937  | 12002.10598 | 725.3586551 |
| Fibroblast - Gingival, donor2.CNhs11961.11318-117D4                                  | 0         | 0.6141716  | 7.3700591   | 13.8802779 | 2.702355   | 17.3196388 | 7.738562   | 705.3146502 | 63.5053421  |
| Fibroblast - Gingival, donor3.CNhs12006.11394-118C8                                  | 0         | 0.2066516  | 23.3516265  | 38.9538195 | 6.1995469  | 12.1924421 | 0.7232805  | 1611.985512 | 602.3893042 |
| Fibroblast - Gingival, donor4 (GFH2).CNhs10848.11222-116B7                           | 0         | 4.752011   | 60.588146   | 57.024137  | 0          | 8.316021   | 0          | 13755.88509 | 1701.220092 |
| Fibroblast - Gingival, donor5 (GFH3).CNhs11952.11303-117B7                           | 0         | 6.6762071  | 40.5517764  | 49.4533858 | 0.7418008  | 7.9125418  | 0.4945338  | 15957.12229 | 914.1458375 |
| Fibroblast - Gingival, donor6 (aggressive periodontitis).CNhs14128.11921-125H4       | 0         | 9.4624063  | 25.4650052  | 11.2713958 | 2.3656015  | 10.4364776 | 0.6957651  | 3864.697213 | 258.8246431 |
| Fibroblast - Gingival, donor6 (control).CNhs14129.11922-125H5                        | 0         | 7.7224359  | 12.4963053  |            |            |            |            |             |             |

|                                                                         |           |            |             |            |            |            |            |             |             |
|-------------------------------------------------------------------------|-----------|------------|-------------|------------|------------|------------|------------|-------------|-------------|
| Fibroblast - Lymphatic, donor1.CNhs11322.11506-119G3                    | 0         | 0          | 0           | 10.9219362 | 0          | 5.4609682  | 14.5625818 | 4353.301794 | 2242.637596 |
| Fibroblast - Lymphatic, donor2.CNhs12082.11586-120G2                    | 0         | 4.752388   | 9.504776    | 9.504776   | 0          | 9.504776   | 4.752388   | 12798.17968 | 5127.82617  |
| Fibroblast - Lymphatic, donor3.CNhs12118.11667-122G2                    | 0         | 0.7186181  | 0           | 11.4978902 | 0          | 13.6537447 | 6.4675633  | 10509.79032 | 1616.890819 |
| Fibroblast - Mammary, donor1.CNhs11348.11540-120B1                      | 0         | 1.0501185  | 4.550514    | 12.2513831 | 0          | 6.3007112  | 3.8504347  | 4368.843198 | 761.3359471 |
| Fibroblast - Mammary, donor2.CNhs12103.11620-122A9                      | 0         | 2.942482   | 0           | 5.884965   | 0          | 17.654894  | 5.884964   | 7323.838492 | 632.633698  |
| Fibroblast - Mammary, donor3.CNhs12128.11701-123A9                      | 0         | 0          | 0           | 42.966561  | 0          | 8.593312   | 0          | 13740.70648 | 1632.729    |
| Fibroblast - Periodontal Ligament, donor1.CNhs10867.11238-116D5         | 0         | 0.6733445  | 10.9418473  | 22.0520309 | 11.2785196 | 15.4869224 | 4.5450751  | 631.9337716 | 206.2117396 |
| Fibroblast - Periodontal Ligament, donor2.CNhs11962.11319-117D5         | 0         | 2.2521333  | 17.8919483  | 28.2767855 | 13.2625631 | 16.140289  | 3.6284371  | 1239.674295 | 150.2673423 |
| Fibroblast - Periodontal Ligament, donor3.CNhs11907.11395-118C9         | 0         | 0.5541282  | 21.3339369  | 26.321091  | 25.7669627 | 7.7577952  | 0.5541282  | 733.9428412 | 122.7394031 |
| Fibroblast - Periodontal Ligament, donor4 (PL29).CNhs12493.11223-116B8  | 0         | 2.6338657  | 40.3859412  | 19.7539929 | 0.4389776  | 7.023642   | 0          | 11025.80476 | 216.8549447 |
| Fibroblast - Periodontal Ligament, donor5 (PL30).CNhs11953.11304-117B8  | 0         | 3.064878   | 27.5839017  | 13.7919508 | 0          | 1.8389268  | 0.3064878  | 9342.054504 | 426.0180362 |
| Fibroblast - Periodontal Ligament, donor6 (PLH3).CNhs11996.11380-118B3  | 0         | 6.4602366  | 53.634987   | 40.2637998 | 0.9014284  | 7.662141   | 0.1502381  | 15130.02609 | 1234.355892 |
| Fibroblast - Pulmonary Artery, donor1.CNhs10878.11250-116E8             | 0         | 1.8149149  | 6.9193632   | 13.611862  | 0.1134322  | 10.3223286 | 3.5163977  | 1594.402766 | 819.4340913 |
| Fibroblast - skin dystrophia myotonica, donor1.CNhs11353.11556-120C8    | 0         | 3.2033608  | 292.7871801 | 22.8506406 | 5.3389347  | 5.5524922  | 0.2135574  | 10152.73182 | 1840.22402  |
| Fibroblast - skin dystrophia myotonica, donor2.CNhs11354.11557-120C9    | 0         | 8.0534122  | 184.8046178 | 16.954552  | 0          | 6.5698889  | 1.0596595  | 7487.130204 | 2602.099882 |
| Fibroblast - skin dystrophia myotonica, donor3.CNhs11913.11560-120D3    | 0         | 4.3282062  | 74.1978211  | 16.1792471 | 0          | 10.9235681 | 0.1030525  | 5714.984114 | 1489.727363 |
| Fibroblast - skin normal, donor1.CNhs11351.11553-120C5                  | 0         | 3.908454   | 103.1087385 | 22.8923734 | 4.8390383  | 3.908454   | 0.1861169  | 6874.598322 | 1370.750647 |
| Fibroblast - skin normal, donor2.CNhs11914.11561-120D4                  | 0         | 4.09235422 | 86.7189345  | 9.84113752 | 0          | 1.7538661  | 0          | 6800.713212 | 784.1730176 |
| Fibroblast - skin spinal muscular atrophy, donor1.CNhs11074.11555-120C7 | 0         | 4.7865947  | 251.0200737 | 18.4099798 | 0.3681996  | 4.5104451  | 0          | 7752.534514 | 2503.665193 |
| Fibroblast - skin spinal muscular atrophy, donor2.CNhs11911.11558-120D1 | 0         | 7.9206568  | 374.2106216 | 23.4386782 | 6.9507804  | 5.4959659  | 0          | 6472.14647  | 2937.593791 |
| Fibroblast - skin spinal muscular atrophy, donor3.CNhs11912.11559-120D2 | 0         | 1.7127857  | 24.3820078  | 11.9894997 | 0.2015042  | 2.5188025  | 0.2015042  | 3719.162955 | 342.4563819 |
| Fibroblast - skin walker warburg, donor1.CNhs11352.11554-120C6          | 0         | 7.1215449  | 34.0816792  | 13.3952868 | 0.5086818  | 5.9346207  | 0.1695606  | 2466.428375 | 363.8770311 |
| Fibroblast - Villous Mesenchymal, donor1.CNhs11343.11535-120A5          | 0         | 2.2803238  | 0.6219065   | 15.3403604 | 0.2073022  | 6.4263672  | 2.487626   | 2545.25601  | 952.7607611 |
| Fibroblast - Villous Mesenchymal, donor2.CNhs12099.11615-122A4          | 0         | 0          | 18.37213    | 6.124043   | 0          | 16.330781  | 8.165391   | 3798.948132 | 908.399741  |
| Fibroblast - Villous Mesenchymal, donor3.CNhs12920.11696-123A4          | 0         | 1.0436657  | 26.613474   | 10.958489  | 1.043666   | 28.700805  | 2.087331   | 2301.282769 | 1109.416591 |
| gamma delta positive T cells, donor1.CNhs13914.11937-126A2              | 0         | 0          | 0           | 0          | 0          | 7.2006808  | 0          | 0           | 0           |
| gamma delta positive T cells, donor2.CNhs13915.11938-126A3              | 0         | 0          | 0           | 0.2521624  | 0          | 4.28676    | 0.5043247  | 0           | 0           |
| Gingival epithelial cells, donor1 (GEA11).CNhs11061.11221-116B6         | 0         | 0.3865217  | 6.5708691   | 17.7799985 | 0.3865217  | 10.6293469 | 5.9910865  | 30.7284759  | 0           |
| Gingival epithelial cells, donor2 (GEA14).CNhs11896.11302-117B6         | 0         | 0          | 2.7274612   | 20.4559591 | 0.2727461  | 17.1830056 | 2.4547151  | 165.2841488 | 0.5454922   |
| Gingival epithelial cells, donor3 (GEA15).CNhs11903.11379-118B2         | 0         | 0.5736092  | 4.302069    | 22.3707584 | 0.5736092  | 20.3631263 | 0.2868046  | 10.6117701  | 0           |
| Hair Follicle Dermal Papilla Cells, donor1.CNhs12501.11271-116H2        | 0         | 7.822476   | 37.547887   | 21.902934  | 18.773944  | 10.951467  | 4.693486   | 4491.666071 | 1541.027893 |
| Hair Follicle Dermal Papilla Cells, donor2.CNhs11979.11348-117G7        | 0.6432409 | 3.2162047  | 100.9888272 | 32.1620469 | 49.5295523 | 18.0107462 | 3.8594456  | 4409.416632 | 811.126823  |
| Hair Follicle Dermal Papilla Cells, donor3.CNhs12030.11420-118F7        | 0         | 1.381349   | 22.101587   | 19.33889   | 13.813492  | 4.144047   | 26.245635  | 1436.603176 | 96.69444    |
| Hair Follicle Outer Root Sheath Cells, donor1.CNhs12339.11504-119G1     | 0         | 0          | 62.225304   | 18.1103493 | 1.3931037  | 6.965519   | 0          | 1596.032569 | 653.8300425 |
| Hair Follicle Outer Root Sheath Cells, donor2.CNhs12347.11584-120F9     | 0         | 0.7218795  | 54.8628406  | 9.3844333  | 5.0531565  | 3.6093975  | 0          | 2201.73242  | 673.5135564 |
| Hepatic Sinusoidal Endothelial Cells, donor1.CNhs12075.11521-119H9      | 0         | 0          | 0           | 8.8578655  | 0          | 2.9526219  | 497.516776 | 104.8180748 | 8.857865    |
| Hepatic Sinusoidal Endothelial Cells, donor2.CNhs12092.11601-120H8      | 0         | 0          | 0           | 11.219342  | 0          | 12.621759  | 197.740901 | 6843.798562 | 179.5095    |
| Hepatic Sinusoidal Endothelial Cells, donor3.CNhs12625.11682-122H8      | 0         | 9.832923   | 0           | 6.555282   | 0          | 9.832923   | 419.538051 | 81.941025   | 16.38821    |
| Hepatic Stellate Cells (lipocyte), donor1.CNhs11335.11524-119I3         | 0         | 0          | 81.491653   | 6.996758   | 0          | 15.639812  | 2.05787    | 12689.64991 | 4897.730734 |
| Hepatic Stellate Cells (lipocyte), donor2.CNhs12093.11604-120I2         | 0         | 1.470087   | 55.863309   | 8.820522   | 0          | 11.760696  | 4.410261   | 28156.57849 | 5917.100632 |
| Hepatic Stellate Cells (lipocyte), donor3.CNhs12627.11685-122I2         | 0         | 0.6242381  | 8.7393337   | 11.2362861 | 0          | 12.0686035 | 8.9474131  | 3624.326514 | 1330.043351 |
| Hepatocyte, donor1.CNhs12340.11523-119I2                                | 0         | 0          | 0           | 0          | 1.26755    | 1.26755    | 1.26755    | 10.140402   | 3.802651    |
| Hepatocyte, donor2.CNhs12349.11603-120I1                                | 0         | 0          | 0.9828272   | 0          | 0          | 0.9828272  | 0.9828272  | 4.914136    | 7.862618    |
| Hepatocyte, donor3.CNhs12626.11684-122I1                                | 0         | 0          | 6.498689    | 11.2250081 | 1.7723697  | 1.1815798  | 30.7210751 | 153.6053755 | 255.2212396 |
| immature langerhans cells, donor1.CNhs13537.11904-125F5                 | 0         | 0          | 0.6749217   | 2.2497389  | 0          | 0.2249739  | 0          | 2.4747128   | 0           |
| immature langerhans cells, donor2.CNhs13480.11905-125F6                 | 0         | 0          | 0.773802    | 17.023643  | 0.773802   | 0          | 0          | 7.73802     | 2.321406    |
| Intestinal epithelial cells (polarized), donor1.CNhs10875.11246-116E4   | 0.6149422 | 0          | 0           | 10.4540173 | 0          | 1.8448266  | 0          | 4.4275836   | 0.6149422   |
| Iris Pigment Epithelial Cells, donor1.CNhs12596.11530-119I9             | 0         | 3.602924   | 10.6372043  | 14.0685603 | 3.7744918  | 10.2940687 | 0.8578391  | 1485.090966 | 119.9258994 |
| Keratinocyte - epidermal, donor1.CNhs11064.11272-116H3                  | 0         | 0          | 31.2788315  | 23.0475599 | 0.2195006  | 23.3768108 | 4.1705109  | 36.4370951  | 0           |
| Keratinocyte - epidermal, donor2.CNhs11381.11349-117G8                  | 0         | 0          | 16.860265   | 7.868123   | 0          | 21.356334  | 2.248035   | 11.240176   | 0           |
| Keratinocyte - epidermal, donor3.CNhs12031.11421-118F8                  | 0         | 0.2010579  | 1.4074057   | 9.3491945  | 0          | 10.555542  | 0.5026449  | 2.8148112   | 0.4021159   |
| Keratinocyte - oral, donor1.CNhs10879.11251-116E9                       | 0         | 0          | 4.72201072  | 21.3879308 | 0.83329601 | 21.8508731 | 0          | 17.86956997 | 1.296238    |
| Keratocytes, donor1.CNhs11337.11527-119I6                               | 0         | 0.3258083  | 60.926153   | 8.7968243  | 0.9774249  | 32.2550221 | 0.3258083  | 821.3627372 | 161.9627277 |
| Keratocytes, donor2.CNhs12095.11607-120I5                               | 0         | 1.039935   | 28.07824    | 9.359414   | 4.159739   | 8.319479   | 3.119804   | 2335.693533 | 374.376523  |
| Keratocytes, donor3.CNhs12921.11688-122I5                               | 0         | 3.0161945  | 57.5590459  | 22.3701095 | 0.7540486  | 17.091769  | 0          | 1023.495347 | 208.6201223 |
| Lens Epithelial Cells, donor1.CNhs12342.11529-119I8                     | 0         | 2.886627   | 8.65988     | 17.319761  | 0          | 17.319761  | 14.433134  | 775.059303  | 0           |
| Lens Epithelial Cells, donor2.CNhs12568.11609-120I7                     | 0.8115128 | 1.2752344  | 21.215264   | 18.317004  | 1.7389561  | 13.7957182 | 0          | 266.4080699 | 3.4779121   |
| Lens Epithelial Cells, donor3.CNhs12572.11690-122I7                     | 0         | 2.1133565  | 5.6356174   | 75.9634252 | 1.8785391  | 12.3279128 | 0.3522261  | 15005.88783 | 543.6022543 |
| Macrophage - monocyte derived, donor1.CNhs10861.11232-116C8             | 0         | 0          | 0           | 0.246217   | 0          | 0.246217   | 0          | 0.738651    | 0.738651    |
| Macrophage - monocyte derived, donor2.CNhs11899.11313-117C8             | 0         | 0          | 0           | 0.2340043  | 0          | 0.9360171  | 0          | 1.4040256   | 0           |
| Macrophage - monocyte derived, donor3.CNhs12003.11389-118C3             | 0         | 0          | 0           | 0.2972624  | 0          | 0.7431559  | 0          | 2.229467    | 0.2972623   |
| Mallassez-derived cells, donor2.CNhs13550.11929-125I3                   | 0         | 0          | 7.5591957   | 18.6460162 | 1.1758748  | 5.8793745  | 0          | 474.2135483 | 12.7666417  |
| Mallassez-derived cells, donor3.CNhs13551.11930-125I4                   | 0.1417751 | 0.1417751  | 0.9924257   | 10.0660318 | 0.1417751  | 8.5065059  | 0.5671004  | 628.63682   | 1.843076    |
| Mammary Epithelial Cell, donor1.CNhs11077.11273-116H4                   | 0         | 0          | 7.0751233   | 13.1651028 | 0          | 27.8527006 | 0          | 1.79117046  | 0           |
| Mammary Epithelial Cell, donor2.CNhs11382.11350-117G9                   | 0         | 0.2906339  | 6.6845806   | 12.2066254 | 0.2906339  | 28.77276   | 0          | 1.1625357   | 0           |
| Mammary Epithelial Cell, donor3.CNhs12032.11422-118F9                   | 0.3833827 | 0          | 26.453405   | 9.9679497  | 0          | 24.9198742 | 7.6676535  | 69.0088824  | 17.6356     |
| Mast cell - stimulated, donor1.CNhs11073.11487-119E2                    | 0         | 0          | 0           | 1.4779897  | 0          | 0.9853264  | 0          | 0.9853265   | 0.9853264   |
| Mast cell, donor1.CNhs12566.11563-120D6                                 | 0         | 0          | 0           | 1.8490171  | 0          | 1.4968235  | 0          | 0           | 0.17609686  |
| Mast cell, donor2.CNhs12594.11565-120D8                                 | 0         | 0          | 7.4638121   | 3.3172498  | 1.2439687  | 1.6586249  | 0.6219843  | 54.5272941  | 33.37983    |
| Mast cell, donor3.CNhs12593.11566-120D9                                 | 0         | 0          | 5.1883183   | 9.223677   | 0.14412    | 3.8912387  | 0.2882399  | 31.8505103  | 17.29439    |
| Mast cell, donor4.CNhs12592.11567-120E1                                 | 0         | 0          | 7.4483036   | 2.2723638  | 0.6312122  | 1.5149093  | 0.2524849  | 41.1550331  | 29.9194567  |
| Mast cell, expanded and stimulated, donor5.CNhs13925.11940-126A5        | 0         | 0          | 0           | 1.76080081 | 0          | 0.92232425 | 0          | 0           | 0.251543    |
| Mast cell, expanded and stimulated, donor8.CNhs13927.11942-126A7        | 0         | 0          | 0           | 0.4993097  | 0          | 0.4993097  | 0          | 1.4979291   | 1.4979291   |
| Mast cell, expanded, donor5.CNhs13924.11939-126A4                       | 0         | 0          | 0           | 2.78628231 | 0          | 1.39314116 | 0          | 0           | 0           |
| Mast cell, expanded, donor8.CNhs13926.11941-126A6                       | 0         | 0          | 0           | 0.7791444  | 0          | 1.1687166  | 0          | 1.8180036   | 1.4284314   |
| Melanocyte - dark, donor1.CNhs12591.11502-119F8                         | 0         | 0          | 0           | 0.209535   | 0          | 13.5150039 | 214.878084 | 7.8575604   | 0.8381398   |
| Melanocyte - dark, donor2.CNhs12346.11582-120F7                         | 0         | 1.7510185  | 17.5101852  | 40.7111808 | 0          | 7.8795834  | 7.4418288  | 3519.109494 | 1975.586659 |
| Melanocyte - dark, donor3.CNhs12570.11663-122F7                         | 0         | 0          | 0.06349789  | 14.7950094 | 9.77867572 | 2.73040943 | 0          | 22.09726717 | 35.74931448 |
| Melanocyte - light, donor1.CNhs11303.11274-116H5                        | 0         | 0          | 0           | 22.5373171 | 15.2795372 | 10.6956759 | 0          | 0           | 0           |
| Melanocyte - light, donor2.CNhs11383.11351-117H1                        | 0         | 0          | 0           | 10.54957   | 7.033046   | 4.688698   | 0          | 0           | 0           |
| Melanocyte - light, donor3.CNhs12033.11423-118G1                        | 1.710724  | 0          | 32.503764   | 8.553621   | 0          | 10.264346  | 15.39652   | 1103.417269 | 443.0776    |
| Meningeal Cells, donor1.CNhs11320.11493-119E8                           | 0         | 1.0091798  | 1.345573    | 16.5954005 | 0.7849176  | 22.3140858 | 53.7107894 | 1859.806165 | 394.2528927 |
| Meningeal Cells, donor2.CNhs12080.11573-120E7                           | 0         | 0.8719201  | 0           | 21.7980035 | 0.4359601  | 16.1305225 | 0.4359601  | 4866.622248 | 1167.065104 |
| Meningeal Cells, donor3.CNhs12731.11654-122E7                           | 0         | 0.44002972 | 0.51336801  | 23.10156   | 0.95339772 | 18.7746012 | 28.6019315 | 1271.025832 | 201.8269626 |
| mesenchymal precursor cell - adipose, donor1.CNhs12363.11747-123G1      | 0         | 3.1343509  | 52.985455   | 27.9106481 | 0.1492548  | 7.4627401  | 7.76124    |             |             |



|                                                                                                   |           |            |             |            |            |             |            |             |             |
|---------------------------------------------------------------------------------------------------|-----------|------------|-------------|------------|------------|-------------|------------|-------------|-------------|
| mesenchymal precursor cell - ovarian cancer left ovary, donor3.CNhs12376.11760-123H5              | 0         | 3.571048   | 19.5631326  | 44.7157317 | 0          | 8.5394627   | 0.4657889  | 5216.835351 | 1314.921982 |
| mesenchymal precursor cell - ovarian cancer left ovary, donor4.CNhs13094.11836-124G9              | 0         | 9.952949   | 14.5147172  | 24.8823724 | 0          | 4.5617682   | 5.3911807  | 3938.879562 | 1467.64527  |
| mesenchymal precursor cell - ovarian cancer metastasis, donor1.CNhs12374.11758-123H3              | 0         | 5.3168342  | 14.6212942  | 24.191596  | 0          | 9.0386183   | 2.3925755  | 7407.413535 | 2290.492213 |
| mesenchymal precursor cell - ovarian cancer metastasis, donor2.CNhs13093.11835-124G8              | 0         | 1.0434901  | 10.2610771  | 29.7394686 | 1.0434902  | 9.9131562   | 4.6957056  | 6026.155464 | 1671.671178 |
| mesenchymal precursor cell - ovarian cancer metastasis, donor3.CNhs12378.11762-123H7              | 0         | 0.751288   | 192.3297395 | 36.9633718 | 0.4507728  | 10.6682902  | 1.2020608  | 15753.00336 | 8990.814292 |
| mesenchymal precursor cell - ovarian cancer metastasis, donor4.CNhs13097.11838-124H2              | 0         | 4.5696625  | 169.4583192 | 21.705897  | 0.7616104  | 6.4736886   | 0          | 4499.975192 | 5825.558137 |
| mesenchymal precursor cell - ovarian cancer right ovary, donor1.CNhs12373.11757-123H2             | 0         | 4.0687073  | 13.426734   | 16.6817001 | 0          | 4.475578    | 0.4068707  | 1850.448095 | 1108.722748 |
| mesenchymal precursor cell - ovarian cancer right ovary, donor2.CNhs12375.11759-123H4             | 0         | 3.4551246  | 2.182184    | 46.9169541 | 0          | 8.1831897   | 5.0917625  | 4353.456901 | 1784.84459  |
| mesenchymal precursor cell - ovarian cancer right ovary, donor3 (SOC-57-02).CNhs12377.11761-123H6 | 0         | 1.3963372  | 60.2573225  | 29.4304927 | 0.4296422  | 22.9858592  | 3.2223167  | 4877.405985 | 1886.773845 |
| mesenchymal precursor cell - ovarian cancer right ovary, donor3 (SOC-57-02-G).CNhs13507.11842-124 | 0         | 0.4640338  | 1.856135    | 18.5613503 | 0          | 12.5289115  | 0          | 2281.653998 | 894.1930553 |
| mesenchymal precursor cell - ovarian cancer right ovary, donor4.CNhs13096.11837-124H1             | 0         | 1.9904794  | 10.3504932  | 31.4495752 | 0.7961918  | 14.331452   | 2.3885754  | 7057.842011 | 2000.829937 |
| Mesenchymal stem cells - adipose, donor0.CNhs10844.11217-116B2                                    | 0         | 1.6286809  | 0           | 12.0522388 | 0          | 4.2345703   | 13.3551836 | 2589.602665 | 1102.616984 |
| Mesenchymal Stem Cells - adipose, donor1.CNhs11345.11537-120A7                                    | 0         | 0          | 14.30626    | 46.495338  | 0          | 7.153128    | 64.378159  | 11448.58283 | 3136.647029 |
| Mesenchymal Stem Cells - adipose, donor2.CNhs12101.11617-122A6                                    | 0         | 0          | 6.621074    | 6.621074   | 0          | 13.242148   | 6.621074   | 3582.001197 | 900.466106  |
| Mesenchymal Stem Cells - adipose, donor3.CNhs12922.11698-123A6                                    | 0         | 3.381211   | 1.690606    | 11.8342385 | 0          | 0           | 16.0607523 | 4617.043635 | 826.706092  |
| Mesenchymal Stem Cells - amniotic membrane, donor1.CNhs11349.11547-120B8                          | 0         | 1.5956287  | 4.786886    | 25.7959972 | 0.2659381  | 5.8506385   | 0          | 5241.108401 | 1013.7561   |
| Mesenchymal Stem Cells - amniotic membrane, donor2.CNhs12104.11627-122B7                          | 0         | 2.080148   | 1.040074    | 22.881636  | 0          | 4.160297    | 0          | 5725.609398 | 790.456521  |
| Mesenchymal Stem Cells - bone marrow, donor1.CNhs11344.11536-120A6                                | 0         | 1.5432442  | 7.9734286   | 9.0022581  | 0.2572074  | 9.7738802   | 1.2860369  | 2046.856284 | 131.1757609 |
| Mesenchymal Stem Cells - bone marrow, donor2.CNhs12100.11616-122A5                                | 0         | 1.418491   | 2.836982    | 11.347931  | 0          | 7.092457    | 1.418491   | 3316.432708 | 89.364953   |
| Mesenchymal Stem Cells - bone marrow, donor3.CNhs12126.11697-123A5                                | 0         | 0.7992665  | 4.7955992   | 9.8576207  | 0.2664222  | 9.5911985   | 1.0656887  | 2578.700271 | 110.03236   |
| Mesenchymal Stem Cells - bone marrow, donor4.CNhs11316.11464-119B6                                | 0         | 1.8699233  | 38.5884197  | 28.3888374 | 0.339986   | 9.6896032   | 0.5099791  | 2419.510914 | 900.9631029 |
| Mesenchymal stem cells - hepatic, donor0.CNhs10845.11218-116B3                                    | 0         | 0.7107838  | 8.1740147   | 25.5882203 | 4.2647033  | 3.1985275   | 0.7107839  | 6514.33442  | 6055.523415 |
| Mesenchymal Stem Cells - hepatic, donor1.CNhs11346.11538-120A8                                    | 0         | 0          | 60.351699   | 10.849744  | 2.712436   | 11.527853   | 0          | 16512.63139 | 8097.299144 |
| Mesenchymal Stem Cells - hepatic, donor2.CNhs12730.11618-122A7                                    | 0         | 0.428934   | 12.15313    | 28.166665  | 5.147208   | 4.718274    | 0.142978   | 6304.900592 | 5531.246663 |
| Mesenchymal stem cells - umbilical, donor0.CNhs12492.11214-116A8                                  | 0         | 0.7919519  | 2.3758556   | 7.1275668  | 0          | 5.5436631   | 0.7919519  | 3498.843374 | 1545.890056 |
| Mesenchymal Stem Cells - umbilical, donor1.CNhs11347.11539-120A9                                  | 0         | 1.6278648  | 170.383184  | 25.5032154 | 1.0852432  | 11.9376753  | 0          | 30925.09398 | 19803.51811 |
| Mesenchymal Stem Cells - umbilical, donor2.CNhs12102.11619-122A8                                  | 0         | 4.174623   | 162.810309  | 25.04774   | 0          | 8.349247    | 0          | 35651.28312 | 15208.15273 |
| Mesenchymal Stem Cells - umbilical, donor3.CNhs12127.11700-123A8                                  | 0         | 0          | 9.878884    | 13.9950858 | 0          | 13.1718454  | 0.8232403  | 7818.313478 | 2448.316762 |
| Mesenchymal Stem Cells - Vertebral, donor1.CNhs10846.11219-116B4                                  | 0         | 1.8695147  | 1.068294    | 21.6329569 | 0          | 8.0122062   | 0.8122062  | 535.2153743 | 129.2635935 |
| Mesenchymal Stem Cells - Wharton's Jelly, donor1.CNhs11057.11548-120B9                            | 0         | 1.809804   | 48.9939803  | 33.2228309 | 0.1292717  | 3.8781514   | 0          | 6772.803732 | 3271.608582 |
| Mesothelial Cells, donor1.CNhs10850.11247-116E5                                                   | 0         | 0.9043181  | 315.60703   | 19.5935595 | 0.3014394  | 5.1244694   | 0          | 624.5823894 | 2179.105257 |
| Mesothelial Cells, donor3.CNhs12012.11402-118D7                                                   | 0         | 0.299919   | 209.3434435 | 24.4933828 | 0          | 16.5955165  | 0.19994598 | 639.6271976 | 977.9358    |
| migratory langerhans cells, donor1.CNhs13535.11901-125F2                                          | 0         | 0          | 0.1948603   | 3.8972061  | 0.3897206  | 0.1948603   | 0          | 1.7537427   | 0           |
| migratory langerhans cells, donor2.CNhs13536.11902-125F3                                          | 0         | 0          | 0           | 0.797189   | 0          | 0.3985945   | 0          | 1.3286483   | 0.2657297   |
| migratory langerhans cells, donor3.CNhs13547.11903-125F4                                          | 0         | 0          | 0           | 4.5798311  | 0          | 0.6542616   | 0          | 1.9627848   | 0           |
| Multipotent Cord Blood Unrestricted Somatic Stem Cells, donor1.CNhs11350.11549-120C1              | 0         | 0.2396249  | 8.6264948   | 17.9718642 | 3.8339976  | 12.7001173  | 0.4792497  | 8217.45517  | 1691.27223  |
| Multipotent Cord Blood Unrestricted Somatic Stem Cells, donor2.CNhs12105.11629-122B9              | 0         | 1.148619   | 13.783433   | 17.22929   | 3.445858   | 14.932052   | 0          | 23826.95997 | 2775.064368 |
| Myoblast, donor1.CNhs10870.11241-116D8                                                            | 0         | 0.8686878  | 2.6060635   | 15.7811625 | 3.1851887  | 2.0269382   | 6.6599401  | 1837.274781 | 332.4178801 |
| Myoblast, donor2.CNhs11965.11322-117D8                                                            | 0         | 1.0273816  | 11.9176265  | 17.4654874 | 0          | 8.0135765   | 10.0683398 | 2064.00966  | 70.8893313  |
| Myoblast, donor3.CNhs11908.11398-118D3                                                            | 0         | 1.0743658  | 0.179061    | 18.0851573 | 0          | 5.192768    | 11.8180236 | 1088.153474 | 251.4015924 |
| nasal epithelial cells, donor1, tech_rep1.CNhs12589.12226-129F3                                   | 0         | 0          | 13.9879508  | 12.169518  | 0          | 37.207949   | 0          | 6.1546982   | 0           |
| nasal epithelial cells, donor2.CNhs12574.12227-129F4                                              | 0         | 0          | 6.8428499   | 18.6623179 | 1.2441546  | 29.2376313  | 0          | 1669.033289 | 1440.109    |
| Natural Killer Cells, donor1.CNhs10859.11230-116C6                                                | 0         | 0          | 0           | 0          | 0          | 3.3495229   | 0          | 2.5613999   | 0           |
| Natural Killer Cells, donor2.CNhs11957.11311-117C6                                                | 0         | 0          | 0           | 0          | 0          | 1.7250205   | 0          | 3.8812964   | 0           |
| Natural Killer Cells, donor3.CNhs12001.11387-118C1                                                | 0         | 0          | 0           | 0.128343   | 0          | 4.8770354   | 0          | 3.593605    | 0           |
| Neural stem cells, donor1.CNhs11063.11275-116H6                                                   | 0.5081892 | 1.0163785  | 0           | 199.972469 | 57.9335743 | 9.4015011   | 1.5245677  | 93.2527268  | 36.08144    |
| Neural stem cells, donor2.CNhs11384.11352-117H2                                                   | 11.712587 | 0          | 0           | 242.060129 | 79.385313  | 5.205595    | 2.602797   | 58.562938   | 11.71259    |
| Neurons, donor1.CNhs12338.11494-119E9                                                             | 7.7328881 | 0          | 0           | 61.8631051 | 49.4904841 | 6.9595992   | 0          | 66.5028378  | 8.506177    |
| Neurons, donor2.CNhs12726.11574-120E8                                                             | 14.238883 | 0.5025488  | 0.3350325   | 106.875377 | 45.3969079 | 4.0203903   | 0.1675163  | 95.9868205  | 14.0713663  |
| Neurons, donor3.CNhs13815.11655-122E8                                                             | 5.1035101 | 0.6379388  | 1.2758776   | 42.7418964 | 63.1559365 | 2.5517551   | 0          | 75.2767733  | 12.1208363  |
| Neutrophils, donor1.CNhs10862.11233-116C9                                                         | 0         | 0          | 0           | 0          | 0          | 0           | 0          | 1.498014    | 0           |
| Neutrophils, donor2.CNhs11959.11314-117C9                                                         | 0         | 0          | 0           | 0          | 0          | 0           | 2.991615   | 5.983229    | 0           |
| Neutrophils, donor3.CNhs11905.11390-118C4                                                         | 0         | 0          | 0           | 0          | 0          | 0           | 0          | 2.0720776   | 0           |
| Nucleus Pulposus Cell, donor1.CNhs10881.11252-116F1                                               | 0         | 1.7176809  | 1.9630639   | 86.7428847 | 1.1042235  | 8.5884044   | 0.245383   | 1805.650684 | 2011.649698 |
| Nucleus Pulposus Cell, donor2.CNhs12019.11409-118E5                                               | 0         | 0.5001705  | 2.5008526   | 50.017052  | 0.5001705  | 12.504263   | 0.5001705  | 2033.193168 | 1480.504743 |
| Nucleus Pulposus Cell, donor3.CNhs12063.11462-119B4                                               | 0         | 0.54253    | 3.25518     | 25.498912  | 0          | 19.802346   | 0          | 2279.982524 | 817.592781  |
| Olfactory epithelial cells, donor1.CNhs13816.11933-125I7                                          | 0         | 2.9115921  | 41.5941724  | 15.3898438 | 0.2079709  | 7.0710093   | 0.8318835  | 25436.08418 | 3449.612681 |
| Olfactory epithelial cells, donor2.CNhs13817.11934-125I8                                          | 0         | 1.605861   | 33.009364   | 13.3821741 | 14.9880351 | 8.9214496   | 1.6058609  | 1658.34778  | 1574.278969 |
| Olfactory epithelial cells, donor3.CNhs13818.11935-125I9                                          | 0         | 0.4731072  | 31.6981853  | 17.3472656 | 3.6271555  | 13.7201101  | 0.6308096  | 13969.91244 | 1122.052683 |
| Olfactory epithelial cells, donor4.CNhs13819.11936-126A1                                          | 0         | 1.8742626  | 50.1365255  | 23.1940002 | 0.2342828  | 8.4341818   | 2.9285353  | 14563.13651 | 948.2597544 |
| Oligodendrocyte - precursors, donor1.CNhs12586.11496-119F2                                        | 0         | 0.5638481  | 2.2553925   | 8.457722   | 3.946937   | 19.734685   | 3.383089   | 825.4736834 | 371.5759274 |
| Osteoblast - differentiated, donor1.CNhs11311.11276-116H7                                         | 0         | 1.2037844  | 54.170298   | 14.7463589 | 0.3009461  | 7.5236525   | 1.2037844  | 9870.731125 | 2602.280924 |
| Osteoblast - differentiated, donor2.CNhs11980.11353-117H3                                         | 0         | 0          | 34.111125   | 13.64445   | 0          | 4.54815     | 0          | 6035.39515  | 1014.237468 |
| Osteoblast - differentiated, donor3.CNhs12035.11425-118G3                                         | 0         | 1.034731   | 21.729346   | 14.486229  | 1.034731   | 11.382038   | 5.173654   | 3626.731144 | 629.116274  |
| Osteoblast, donor1.CNhs11078.11277-116H8                                                          | 0         | 0.9142409  | 17.8276983  | 10.0566504 | 0          | 15.5420959  | 0.2285602  | 7169.248864 | 590.3710848 |
| Osteoblast, donor2.CNhs11385.11354-117H4                                                          | 0         | 0.6642256  | 25.2405728  | 15.9414144 | 0          | 1.9926768   | 0.6642256  | 4848.84687  | 483.5562357 |
| Osteoblast, donor3.CNhs12036.11426-118G4                                                          | 0         | 2.5811684  | 20.2806087  | 14.5651644 | 0          | 6.6372901   | 0.9218459  | 9398.587105 | 557.7167348 |
| Pancreatic stromal cells, donor1.CNhs10877.11249-116E7                                            | 0         | 18.5062099 | 28.06340747 | 26.6732697 | 17.5504901 | 12.163706   | 0.6081853  | 1486.317813 | 333.8068467 |
| Pericytes, donor1.CNhs11317.11491-119E6                                                           | 0         | 0          | 16.4472971  | 15.6640926 | 0.3916024  | 22.517133   | 2.5454151  | 7018.296688 | 2066.485416 |
| Pericytes, donor2.CNhs12079.11571-120E5                                                           | 0         | 0          | 7.5491552   | 11.323733  | 0          | 13.7257368  | 2.4020039  | 14649.82606 | 3319.226339 |
| Pericytes, donor3.CNhs12116.11652-122E5                                                           | 0         | 1.842813   | 0.789777    | 14.479245  | 0          | 7.89777     | 4.738662   | 8753.625532 | 1264.959571 |
| Perineurial Cells, donor1.CNhs12587.11499-119F5                                                   | 0         | 0.5873671  | 2.7018885   | 20.3229009 | 1.7621013  | 37.0041261  | 1.9970481  | 6287.647123 | 1843.040425 |
| Perineurial Cells, donor2.CNhs12590.11579-120F4                                                   | 0         | 2.34009295 | 15.60061967 | 36.1739369 | 0.6825271  | 9.06786019  | 7.70280596 | 2625.876933 | 2283.345696 |
| Peripheral Blood Mononuclear Cells, donor1.CNhs10860.11231-116C7                                  | 0         | 0          | 0           | 1.0338402  | 0          | 4.5488966   | 0          | 1.8609123   | 0           |
| Peripheral Blood Mononuclear Cells, donor2.CNhs11958.11312-117C7                                  | 0         | 0          | 0           | 0.4314284  | 0          | 4.0985698   | 0          | 1.5099994   | 0           |
| Peripheral Blood Mononuclear Cells, donor3.CNhs12002.11388-118C2                                  | 0         | 0          | 0           | 0.747093   | 0          | 2.668189    | 0          | 1.707641    | 0.1067276   |
| Placental Epithelial Cells, donor1.CNhs11079.11278-116H9                                          | 0         | 11.5188478 | 3.0312758   | 5.4562963  | 0          | 9.3969547   | 0          | 448.3256783 | 384.9720157 |
| Placental Epithelial Cells, donor2.CNhs11386.11355-117H5                                          | 0         | 8.321772   | 56.588049   | 3.328709   | 0          | 18.307899   | 1.664354   | 6624.130494 | 1459.638805 |
| Placental Epithelial Cells, donor3.CNhs12037.11427-118G5                                          | 0         | 6.9549768  | 40.217909   | 9.6764894  | 0          | 20.2601497  | 0.3023903  | 5589.079791 | 1319.02646  |
| Preadipocyte - breast, donor1.CNhs11052.11467-119B9                                               | 0         | 2.2329703  | 373.154143  | 17.8637622 | 0.7443234  | 2.7291858   | 0.4962156  | 11624.34701 | 2874.080846 |
| Preadipocyte - breast, donor2.CNhs11971.11328-117E5                                               | 0         | 2.2452808  | 291.8864982 | 11.2264038 | 0          | 2.5259409   | 0          | 21408.19402 | 2481.596555 |
| Preadipocyte - omental, donor1.CNhs11065.11468-119C1                                              | 0         | 2.0502263  | 301.383279  | 11.0199669 | 0.3844173  | 2.8190612   | 0.5125565  | 16020.60074 | 3963.343886 |
| Preadipocyte - omental, donor2.CNhs11902.11329-117E6                                              | 0         | 6.140487   | 206.2180212 | 6.6521942  | 3.0702435  | 3.5819507</ |            |             |             |

|                                                                                                   |           |            |             |            |            |            |            |             |             |
|---------------------------------------------------------------------------------------------------|-----------|------------|-------------|------------|------------|------------|------------|-------------|-------------|
| Prostate Stromal Cells, donor3.CNhs12015.11405-118E1                                              | 0         | 5.2449766  | 0.2622488   | 39.8618221 | 0          | 6.949594   | 0.3933732  | 4039.8121   | 927.3118626 |
| Renal Cortical Epithelial Cells, donor1.CNhs11331.11516-119H4                                     | 0         | 0          | 2.7071976   | 7.6703934  | 0.4511996  | 20.3039826 | 0.9023992  | 39.2543662  | 1.804798    |
| Renal Cortical Epithelial Cells, donor2.CNhs12728.11596-120H3                                     | 0         | 0.46209202 | 2.1564294   | 14.0938067 | 0.15403068 | 10.7821472 | 0.07701534 | 17.94457358 | 0.6161227   |
| Renal Epithelial Cells, donor1.CNhs11332.11517-119H5                                              | 0         | 0          | 5.4904484   | 24.3148429 | 0          | 31.3739908 | 7.0591479  | 524.7299958 | 21.96179    |
| Renal Epithelial Cells, donor2.CNhs12088.11597-120H4                                              | 0         | 0          | 7.30696     | 13.152529  | 0          | 18.998099  | 1.461392   | 138.832261  | 10.22975    |
| Renal Epithelial Cells, donor3.CNhs12732.11678-122H4                                              | 0         | 0.4222065  | 3.9054102   | 30.2933175 | 0          | 8.1274755  | 0.2111033  | 50.5592298  | 1.3721711   |
| Renal Glomerular Endothelial Cells, donor1.CNhs12074.11514-119H2                                  | 0         | 0          | 0           | 3.412002   | 0          | 4.549335   | 578.902925 | 85.300039   | 7.961337    |
| Renal Glomerular Endothelial Cells, donor2.CNhs12086.11594-120H1                                  | 0         | 1.3607496  | 0           | 3.9121552  | 0.1700937  | 2.7214993  | 429.486606 | 3.0616867   | 0           |
| Renal Glomerular Endothelial Cells, donor3.CNhs12624.11675-122H1                                  | 0         | 1.2954955  | 3.6705705   | 21.1597598 | 0.6477477  | 7.9888889  | 181.153454 | 1288.370271 | 2.806907    |
| Renal Glomerular Endothelial Cells, donor4.CNhs13080.11783-124B1                                  | 0         | 0          | 6.169091    | 12.338181  | 0          | 16.964999  | 1031.78032 | 822.031264  | 1.542273    |
| Renal Mesangial Cells, donor1.CNhs11333.11518-119H6                                               | 0         | 0.2709464  | 15.9858398  | 19.5081435 | 0          | 15.9858397 | 2.7094644  | 1522.71898  | 53.64739    |
| Renal Mesangial Cells, donor2.CNhs12089.11598-120H5                                               | 0         | 0          | 23.26051    | 10.73562   | 1.78927    | 3.57854    | 1.78927    | 4712.936765 | 189.6626    |
| Renal Mesangial Cells, donor3.CNhs12121.11679-122H5                                               | 0         | 0          | 23.5794194  | 12.0405545 | 0          | 31.104766  | 0          | 3889.600817 | 71.2399479  |
| Renal Proximal Tubular Epithelial Cell, donor1.CNhs11330.11515-119H3                              | 0         | 0.7646288  | 0           | 2.0390101  | 0          | 11.2145559 | 0.2548763  | 5.6072781   | 4.0780204   |
| Renal Proximal Tubular Epithelial Cell, donor2.CNhs12087.11595-120H2                              | 0         | 0          | 0.831076    | 4.15538    | 0          | 11.635064  | 6.648608   | 16.62152    | 9.972912    |
| Renal Proximal Tubular Epithelial Cell, donor3.CNhs12120.11676-122H2                              | 0         | 0          | 3.8058708   | 8.9549902  | 0          | 12.0892368 | 1.5671233  | 223.8747556 | 6.940117    |
| Retinal Pigment Epithelial Cells, donor0.CNhs10842.11215-116A9                                    | 0.2564501 | 0          | 17.4386085  | 4.3596522  | 0          | 3.8467518  | 1.2822506  | 9.2322045   | 2.308051    |
| Retinal Pigment Epithelial Cells, donor1.CNhs11338.11528-119I7                                    | 0         | 0          | 62.6507972  | 11.4805125 | 0          | 8.2003661  | 0.6560293  | 364.0962559 | 52.15433    |
| Retinal Pigment Epithelial Cells, donor2.CNhs12096.11608-120I6                                    | 0         | 0          | 42.455929   | 3.26584    | 0          | 6.531681   | 1.63292    | 729.915403  | 17.96212    |
| Retinal Pigment Epithelial Cells, donor3.CNhs12733.11689-122I6                                    | 0         | 2.2776488  | 19.8480822  | 8.4598383  | 0          | 8.7852167  | 0.9761352  | 73.2101389  | 26.35565    |
| salivary acinar cells, donor1.CNhs12810.11771-123I7                                               | 0         | 0.2072162  | 12.8474022  | 20.307184  | 0          | 9.7391598  | 0          | 9.3247275   | 1.657729    |
| salivary acinar cells, donor2.CNhs12811.11772-123I8                                               | 0         | 0.1707185  | 44.5575227  | 20.486217  | 0          | 5.121554   | 0          | 34.6558512  | 172.425662  |
| salivary acinar cells, donor3.CNhs12812.11773-123I9                                               | 0         | 0          | 44.9318781  | 13.1339336 | 0          | 2.073779   | 0.6912597  | 64.9784087  | 29.0329058  |
| Schwann Cells, donor1.CNhs12073.11498-119F4                                                       | 0         | 0          | 3.6185684   | 8.7879519  | 0.2584692  | 23.2622257 | 9.0464211  | 1716.655072 | 414.8430236 |
| Schwann Cells, donor2.CNhs12345.11578-120F3                                                       | 0         | 0          | 0           | 8.767442   | 0          | 26.302326  | 13.151163  | 648.790717  | 30.68605    |
| Schwann Cells, donor3.CNhs12621.11659-122F3                                                       | 0.2633685 | 0          | 2.8970538   | 15.5387431 | 0.5267371  | 12.1149523 | 4.2138964  | 6245.784633 | 248.61989   |
| Sebocyte, donor1.CNhs10847.11220-116B5                                                            | 0         | 0          | 33.8816667  | 21.8220904 | 0          | 7.465452   | 4.0198588  | 651.2171198 | 67.7633334  |
| Sebocyte, donor2.CNhs11951.11301-117B5                                                            | 0         | 0          | 24.052229   | 18.851746  | 0          | 25.352349  | 0          | 323.0799415 | 19.5018073  |
| Sebocyte, donor3.CNhs11995.11378-118B1                                                            | 0         | 0.5959438  | 73.5990605  | 15.494539  | 0.8939157  | 18.1762862 | 1.4898595  | 1929.666058 | 515.4913959 |
| Sertoli Cells, donor1.CNhs10851.11255-116F4                                                       | 0         | 6.427357   | 9.641036    | 22.49575   | 0          | 4.820517   | 3.213679   | 5710.706861 | 3952.824675 |
| Sertoli Cells, donor2.CNhs11974.11333-117F1                                                       | 0         | 0          | 314.77157   | 34.131858  | 0          | 0          | 3.792429   | 6625.372674 | 4232.35026  |
| Skeletal muscle cells differentiated into Myotubes - multinucleated, donor1.CNhs11084.11282-116I4 | 0         | 1.69160869 | 20.29930414 | 27.5999311 | 0.17806407 | 14.957382  | 1.78064072 | 8338.384    | 4762.234554 |
| Skeletal muscle cells differentiated into Myotubes - multinucleated, donor2.CNhs11984.11359-117H9 | 0         | 0.95559    | 29.62329    | 7.64472    | 0          | 30.57888   | 20.06739   | 776.89464   | 119.44875   |
| Skeletal muscle cells differentiated into Myotubes - multinucleated, donor3.CNhs12041.11431-118G9 | 0         | 1.9213351  | 18.786388   | 24.7638749 | 0.2134817  | 10.6740839 | 1.2808901  | 4332.18374  | 1299.036025 |
| Skeletal Muscle Cells, donor1.CNhs11083.11281-116I3                                               | 0         | 3.1901337  | 10.633779   | 31.224642  | 0.09667072 | 38.088263  | 5.22021878 | 897.68429   | 687.9088314 |
| Skeletal Muscle Cells, donor2.CNhs11983.11358-117H8                                               | 0         | 0          | 18.469917   | 12.313277  | 0          | 29.244035  | 9.234959   | 6170.491334 | 838.842051  |
| Skeletal Muscle Cells, donor3.CNhs12040.11430-118G8                                               | 0         | 3.5958949  | 5.3938422   | 13.4846059 | 0          | 17.0805006 | 17.0805007 | 2108.992357 | 437.8002038 |
| Skeletal Muscle Cells, donor4.CNhs12053.11451-119A2                                               | 0         | 0.6161945  | 2.002632    | 24.1856328 | 0.3080972  | 5.237653   | 1.2323889  | 1316.653531 | 736.0442925 |
| Skeletal Muscle Cells, donor5.CNhs12056.11455-119A6                                               | 0         | 1.6885404  | 4.6051102   | 23.4860621 | 0.1535037  | 5.219125   | 1.5350368  | 2173.151523 | 1059.328859 |
| Skeletal Muscle Cells, donor6.CNhs12060.11459-119B1                                               | 0         | 3.4459143  | 0.6891829   | 14.7485132 | 0          | 5.9269726  | 2.618895   | 1900.077152 | 483.5306964 |
| Skeletal Muscle Satellite Cells, donor1.CNhs10869.11240-116D7                                     | 0         | 1.2890429  | 2.6855061   | 38.6712881 | 0.3222606  | 10.4197637 | 0.7519417  | 2405.891224 | 2427.375273 |
| Skeletal Muscle Satellite Cells, donor2.CNhs11964.11321-117D7                                     | 0         | 0.8701002  | 7.5408682   | 34.3689565 | 0.2900334  | 12.4714358 | 1.0151169  | 3911.245252 | 1469.309143 |
| Skeletal Muscle Satellite Cells, donor3.CNhs12008.11397-118D2                                     | 0         | 1.78975918 | 2.21589231  | 23.2668693 | 0.25567988 | 8.18175623 | 2.89770533 | 1884.616412 | 616.5294227 |
| Small Airway Epithelial Cells, donor1.CNhs10884.11256-116F5                                       | 0         | 0          | 12.8922234  | 17.8507709 | 0.3305698  | 17.354916  | 0.1652849  | 135.6989148 | 0.9917095   |
| Small Airway Epithelial Cells, donor2.CNhs11975.11334-117F2                                       | 0         | 0          | 29.5972704  | 19.987767  | 0          | 29.7894605 | 0.1921901  | 469.9047147 | 3.267231    |
| Small Airway Epithelial Cells, donor3.CNhs12016.11406-118E2                                       | 0         | 0          | 48.7580504  | 19.5234518 | 0.4046311  | 33.1797522 | 0.1011578  | 140.5081578 | 1.921998    |
| Smooth muscle cells - airway, asthmatic, donor1.CNhs14183.11960-126C7                             | 0         | 0.5886897  | 82.1222083  | 56.8085526 | 9.1246898  | 5.0038621  | 0          | 9767.244569 | 7979.394058 |
| Smooth muscle cells - airway, asthmatic, donor2.CNhs14184.11961-126C8                             | 0         | 2.6024265  | 12.5783949  | 9.5422307  | 0.4337378  | 5.2048531  | 0          | 5187.503583 | 570.7988892 |
| Smooth muscle cells - airway, asthmatic, donor3.CNhs14186.11962-126C9                             | 0         | 1.7216569  | 27.546511   | 40.1719938 | 21.8076538 | 6.8866275  | 0          | 3488.650722 | 5074.870592 |
| Smooth muscle cells - airway, asthmatic, donor4.CNhs14187.11963-126D1                             | 0         | 0.9117813  | 16.4120638  | 25.5298766 | 2.2794534  | 4.5589065  | 0          | 1949.388439 | 727.1455938 |
| Smooth muscle cells - airway, asthmatic, donor5.CNhs14188.11964-126D2                             | 0         | 4.1614314  | 10.4035785  | 13.7327237 | 1.6645726  | 2.9130019  | 0          | 456.9251672 | 150.2276733 |
| Smooth muscle cells - airway, asthmatic, donor6.CNhs14189.11965-126D3                             | 0         | 0.4661148  | 6.9917217   | 16.3140174 | 0          | 11.1867548 | 0          | 2859.148062 | 386.4091528 |
| Smooth muscle cells - airway, control, donor1.CNhs14190.11966-126D4                               | 0         | 2.3275845  | 93.8792402  | 24.439637  | 0          | 7.3706841  | 0          | 5344.133951 | 3543.74736  |
| Smooth muscle cells - airway, control, donor2.CNhs14191.11967-126D5                               | 0         | 1.2176739  | 128.464596  | 51.1423037 | 1.8265108  | 10.959065  | 0          | 3847.849513 | 3310.246488 |
| Smooth muscle cells - airway, control, donor3.CNhs14192.11968-126D6                               | 0         | 3.3570986  | 121.5269717 | 13.4283946 | 0.6714197  | 9.3998762  | 0          | 5862.837109 | 2188.82833  |
| Smooth muscle cells - airway, control, donor4.CNhs14193.11969-126D7                               | 0         | 1.9640784  | 66.1239711  | 7.8563134  | 0.6546928  | 11.1297773 | 0          | 4801.516855 | 2237.085232 |
| Smooth Muscle Cells - Aortic, donor0.CNhs10838.11210-116A4                                        | 0         | 5.5762982  | 29.9726028  | 22.3051927 | 0.6970373  | 5.5762982  | 1.3940745  | 1527.905696 | 483.0468282 |
| Smooth Muscle Cells - Aortic, donor1.CNhs11085.11283-116I5                                        | 0.3080336 | 7.7008395  | 48.3612721  | 19.7141491 | 0          | 7.3928059  | 0.3080336  | 2661.410132 | 3243.285566 |
| Smooth Muscle Cells - Aortic, donor2.CNhs11305.11360-117I1                                        | 0         | 3.726142   | 27.679913   | 10.64612   | 0          | 4.790754   | 0.532306   | 1557.527443 | 487.060018  |
| Smooth Muscle Cells - Aortic, donor3.CNhs11309.11432-118H1                                        | 0         | 1.739866   | 28.707789   | 16.528727  | 0          | 5.219598   | 1.739866   | 1411.031314 | 441.056027  |
| Smooth Muscle Cells - Bladder, donor1.CNhs12893.11519-119H7                                       | 0         | 7.465117   | 17.418606   | 32.348841  | 2.488372   | 4.976745   | 0          | 4644.547116 | 5124.802993 |
| Smooth Muscle Cells - Brachiocephalic, donor1.CNhs11086.11284-116I6                               | 0         | 0.3706484  | 105.2641564 | 24.462797  | 0          | 3.3358359  | 0.1853242  | 1545.603987 | 375.8375165 |
| Smooth Muscle Cells - Brachiocephalic, donor2.CNhs11985.11361-117I2                               | 0         | 0.9914419  | 148.9641557 | 51.8028394 | 1.4871629  | 1.487163   | 0.495721   | 4318.96878  | 3445.956326 |
| Smooth Muscle Cells - Brachiocephalic, donor3.CNhs12043.11433-118H2                               | 0         | 1.5743738  | 35.6380969  | 31.6306    | 0          | 0.7156245  | 0          | 1033.934182 | 705.6056917 |
| Smooth Muscle Cells - Brain Vascular, donor1.CNhs10863.11234-116D1                                | 0         | 0          | 0           | 26.7954027 | 0.3721584  | 14.5141765 | 3.7215837  | 2234.43885  | 1160.017637 |
| Smooth Muscle Cells - Brain Vascular, donor2.CNhs11900.11315-117D1                                | 0         | 2.214656   | 2.5310354   | 45.8750165 | 0.6327588  | 5.6948295  | 0          | 4596.676661 | 1132.005582 |
| Smooth Muscle Cells - Brain Vascular, donor3.CNhs12004.11391-118C5                                | 0         | 0.5718906  | 0.953151    | 31.6446122 | 0          | 4.0032342  | 0.1906302  | 9302.753464 | 2395.077756 |
| Smooth Muscle Cells - Bronchial, donor1.CNhs11328.11512-119G9                                     | 0         | 0.5117956  | 9.4682184   | 3.0707735  | 0.2558978  | 14.3302764 | 1.0235912  | 4144.008833 | 671.9876    |
| Smooth Muscle Cells - Bronchial, donor2.CNhs12348.11592-120G8                                     | 0         | 0.427939   | 14.121987   | 24.392523  | 0          | 10.270536  | 0          | 7176.536835 | 1022.346243 |
| Smooth Muscle Cells - Carotid, donor1.CNhs11087.11285-116I7                                       | 0         | 5.4094552  | 101.506836  | 26.4108696 | 0          | 7.6368779  | 8.2732844  | 2819.280776 | 2442.846334 |
| Smooth Muscle Cells - Carotid, donor2.CNhs11986.11362-117I3                                       | 0         | 0          | 88.151814   | 0          | 0          | 9.794646   | 0          | 822.750269  | 352.607258  |
| Smooth Muscle Cells - Carotid, donor3.CNhs12044.11434-118H3                                       | 0         | 0.7849486  | 17.26887    | 14.1290756 | 0          | 5.4946403  | 1.5698972  | 3613.903539 | 657.7869604 |
| Smooth Muscle Cells - Colonic, donor1.CNhs10868.11239-116D6                                       | 0         | 1.7987246  | 5.7559188   | 30.2185729 | 3.0578318  | 5.0364289  | 1.2591072  | 3441.319858 | 3067.724764 |
| Smooth Muscle Cells - Colonic, donor2.CNhs11963.11320-117D6                                       | 0         | 1.3726851  | 12.6287033  | 22.7865734 | 0.549074   | 6.5888886  | 0.8236111  | 8036.797008 | 4238.302663 |
| Smooth Muscle Cells - Colonic, donor3.CNhs12007.11396-118D1                                       | 0         | 2.7096853  | 4.9481208   | 20.8527952 | 1.178124   | 8.3646806  | 0.8246868  | 5516.09449  | 2807.233923 |
| Smooth Muscle Cells - Coronary Artery, donor1.CNhs11088.11286-116I8                               | 0         | 3.4371022  | 34.5732044  | 10.917854  | 0          | 6.267657   | 0.8087299  | 1686.606262 | 450.6647516 |
| Smooth Muscle Cells - Coronary Artery, donor2.CNhs11987.11363-117I4                               | 0         | 1.585103   | 96.691296   | 19.021238  | 0          | 0          | 0          | 2062.219275 | 280.563268  |
| Smooth Muscle Cells - Coronary Artery, donor3.CNhs12045.11435-118H4                               | 0         | 2.5275508  | 34.5431935  | 16.0078213 | 0          | 6.3188768  | 3.7913261  | 2011.509129 | 613.7735708 |
| Smooth Muscle Cells - Esophageal, donor1.CNhs11324.11508-119G5                                    | 0         | 0.4876337  | 0.4876337   | 7.3145061  | 0          | 15.6042796 | 0          | 5776.509273 | 1427.791588 |
| Smooth Muscle Cells - Esophageal, donor2.CNhs12727.11588-120G4                                    | 0         | 0          | 3.84962655  | 19.4192273 | 0.59883079 | 10.6078598 | 0.17109452 | 1898.550595 | 2063.057641 |
| Smooth Muscle Cells - Internal Thoracic Artery, donor1.CNhs11067.11287-116I9                      | 0         | 0.4622688  | 215.417258  | 39.0617131 | 1.8490752  | 2.88918    | 0.2311344  | 2131.636976 | 351.2087162 |
| Smooth Muscle Cells - Internal Thoracic Artery, donor2.CNhs11988.11364-117I5                      | 0         | 9.2611126  | 10.723399   | 24.85877   |            |            |            |             |             |

|                                                                      |           |            |             |            |            |            |            |             |             |
|----------------------------------------------------------------------|-----------|------------|-------------|------------|------------|------------|------------|-------------|-------------|
| Smooth Muscle Cells - Umbilical artery, donor0.CNhs10839.11212-116A6 | 0         | 0.3566711  | 40.6605     | 9.986789   | 0          | 4.993395   | 0          | 2306.948362 | 577.8071035 |
| Smooth Muscle Cells - Umbilical Artery, donor1.CNhs11091.11290-117A3 | 0         | 0.8116415  | 43.8286415  | 7.9135047  | 0          | 4.6669387  | 0          | 2020.378624 | 630.0367204 |
| Smooth Muscle Cells - Umbilical Artery, donor2.CNhs11991.11367-117I8 | 0.3098235 | 1.858941   | 22.9269389  | 7.435764   | 0.3098235  | 5.576823   | 3.098235   | 1541.371904 | 300.2189697 |
| Smooth Muscle Cells - Umbilical Artery, donor3.CNhs12049.11439-118H8 | 0         | 3.6620428  | 30.7048206  | 7.6057812  | 0.2816956  | 6.1973032  | 1.6901736  | 3771.340726 | 612.969631  |
| Smooth Muscle Cells - Umbilical Vein, donor1.CNhs12597.11541-120B2   | 0         | 3.7286952  | 10.8992629  | 8.1744471  | 0.1434114  | 13.1938445 | 0.2868227  | 2169.670348 | 1397.543627 |
| Smooth Muscle Cells - Umbilical Vein, donor2.CNhs12569.11621-122B1   | 0         | 1.37548657 | 11.39688876 | 12.6741263 | 0.09824904 | 8.54766657 | 0.19649808 | 5572.292412 | 3468.092899 |
| Smooth Muscle Cells - Umbilical Vein, donor3.CNhs13076.11702-123B1   | 0         | 0          | 30.191836   | 4.117068   | 0          | 35.681262  | 0          | 5131.239939 | 1394.313929 |
| Smooth Muscle Cells - Uterine, donor1.CNhs11921.11258-116F7          | 0         | 9.689352   | 4.6139772   | 29.2987552 | 0.2306989  | 4.6139772  | 0.2306989  | 5945.340313 | 1633.809324 |
| Smooth Muscle Cells - Uterine, donor3.CNhs11927.11466-119B8          | 0         | 7.8047434  | 0.7095222   | 9.2237876  | 0.7095221  | 11.7071152 | 1.0642832  | 1240.24468  | 323.1873294 |
| Synoviocyte, donor1.CNhs11068.11291-117A4                            | 0         | 0.784143   | 246.0248639 | 16.0749314 | 0.3920715  | 1.9603574  | 0.3920714  | 8240.754748 | 2383.598663 |
| Synoviocyte, donor2.CNhs11992.11368-117I9                            | 0         | 0.6333229  | 367.327286  | 11.6109199 | 0          | 9.7109512  | 0.6333229  | 3589.040907 | 619.1786943 |
| Synoviocyte, donor3.CNhs12050.11440-118H9                            | 0         | 1.3171796  | 399.10541   | 22.721347  | 0          | 13.171795  | 0          | 4305.201431 | 1476.229005 |
| tenocyte, donor1.CNhs12639.11763-123H8                               | 0         | 1.859975   | 144.334067  | 18.227756  | 0.371995   | 8.555885   | 2.603965   | 24556.50714 | 5933.692535 |
| tenocyte, donor2.CNhs12640.11765-123I1                               | 0         | 0.4621756  | 27.7305377  | 13.4030931 | 0          | 11.0922151 | 0.4621756  | 12753.27573 | 2314.113373 |
| tenocyte, donor3.CNhs12641.11768-123I4                               | 0         | 2.1631328  | 328.7961872 | 12.1135437 | 0.4326266  | 11.6809171 | 6.4893984  | 21164.09099 | 4959.198282 |
| Trabecular Meshwork Cells, donor1.CNhs11340.11532-120A2              | 0         | 4.1742049  | 17.0762929  | 11.004722  | 1.5178927  | 6.4510439  | 0.7589463  | 2193.734417 | 614.7465415 |
| Trabecular Meshwork Cells, donor2.CNhs12097.11612-122A1              | 0         | 0          | 21.969308   | 8.787723   | 4.393862   | 35.150893  | 8.787724   | 1819.058704 | 123.028125  |
| Trabecular Meshwork Cells, donor3.CNhs12124.11693-123A1              | 0         | 0.6998694  | 24.8453652  | 15.7470623 | 5.9488902  | 27.6448429 | 0.6998694  | 3233.74675  | 563.3948994 |
| Tracheal Epithelial Cells, donor1.CNhs11092.11292-117A5              | 0         | 0          | 8.3713238   | 9.52598916 | 0          | 18.2822014 | 0.09622211 | 13.37487366 | 0.09622211  |
| Tracheal Epithelial Cells, donor2.CNhs11993.11369-118A1              | 0         | 0.6703023  | 7.3733251   | 5.362419   | 0          | 10.054534  | 2.010907   | 226.5621697 | 56.30539    |
| Tracheal Epithelial Cells, donor3.CNhs12051.11441-118I1              | 0         | 0          | 6.53346     | 5.44455    | 0          | 21.778197  | 0          | 25.044927   | 0           |
| Urothelial cells, donor0.CNhs10843.11216-116B1                       | 0         | 0          | 17.229255   | 13.0942338 | 0          | 11.48617   | 0.2297234  | 14.0131274  | 0.2297234   |
| Urothelial Cells, donor1.CNhs11334.11520-119H8                       | 0         | 0          | 15.4981934  | 6.4575806  | 0          | 8.1796021  | 0.4305054  | 36.1624514  | 0.4305054   |
| Urothelial Cells, donor2.CNhs12091.11600-120H7                       | 0         | 0          | 15.162433   | 6.73886    | 0          | 3.36943    | 0          | 47.172015   | 0           |
| Urothelial Cells, donor3.CNhs12122.11681-122H7                       | 0         | 0          | 27.0492395  | 4.4343016  | 0          | 7.9817429  | 0.4434302  | 40.3521444  | 0           |
| Whole blood (ribopure), donor090309, donation1.CNhs11675.12179-129A1 | 0         | 0          | 0           | 0.5074476  | 0          | 2.0297904  | 0          | 0           | 0           |
| Whole blood (ribopure), donor090309, donation2.CNhs11671.12180-129A2 | 0         | 0          | 0           | 0          | 0          | 0.7646372  | 0          | 0           | 0           |
| Whole blood (ribopure), donor090309, donation3.CNhs11948.12181-129A3 | 0         | 0          | 0           | 0          | 0          | 0          | 0          | 0           | 0           |
| Whole blood (ribopure), donor090325, donation1.CNhs11075.12176-128I7 | 0         | 0          | 0.2382318   | 0.4764636  | 0          | 1.9058543  | 0.2382318  | 0           | 0           |
| Whole blood (ribopure), donor090325, donation2.CNhs11076.12177-128I8 | 0         | 0          | 0.4113623   | 0.4113623  | 0          | 1.6454491  | 0.4113623  | 0           | 0           |
| Whole blood (ribopure), donor090612, donation1.CNhs11672.12182-129A4 | 0         | 0          | 0           | 0.6484733  | 0          | 0.6484733  | 1.2969466  | 0           | 0           |
| Whole blood (ribopure), donor090612, donation2.CNhs11673.12183-129A5 | 0         | 0          | 0           | 0.5400314  | 0          | 1.6200943  | 0          | 0           | 0           |
| Whole blood (ribopure), donor090612, donation3.CNhs11949.12184-129A6 | 0         | 0          | 0           | 0          | 0          | 3.1725008  | 0          | 1.5862504   | 0           |

|              | Baseline-8W          |                        | Baseline-1Y          |                         |
|--------------|----------------------|------------------------|----------------------|-------------------------|
|              | Slit3 <sup>+/+</sup> | Slit3 <sup>-/-</sup>   | Slit3 <sup>+/+</sup> | Slit3 <sup>-/-</sup>    |
| CD1          |                      |                        |                      |                         |
| n            | 8                    | 8                      | 14                   | 19                      |
| BW (g)       | 36±4.63              | 31.63±2.2*             | 50.43±4.42           | 40.79±5.18 <sup>§</sup> |
| HR (bpm/min) | 443±80               | 434±57                 | 497±71               | 496±72                  |
| Diastole     |                      |                        |                      |                         |
| LVV (μl)     | 83±10                | 67±14*                 | 77±14                | 73±17                   |
| LVID (mm)    | 4.31±0.22            | 3.92±0.35*             | 4.15±0.33            | 4.05±0.42               |
| IVST(mm)     | 0.72±0.07            | 0.64±0.06*             | 0.8±0.13             | 0.82±0.11               |
| PWT (mm)     | 0.78±0.15            | 0.68±0.08              | 0.8±0.13             | 0.81±0.15               |
| Systole      |                      |                        |                      |                         |
| LVV (μl)     | 32±6                 | 28±9                   | 36±14                | 31±12                   |
| LVID (mm)    | 2.91±0.23            | 2.7±0.42               | 2.98±0.51            | 2.82±0.46               |
| IVST (mm)    | 1.1±0.1              | 0.95±0.05 <sup>#</sup> | 1.19±0.24            | 1.17±0.18               |
| PWT (mm)     | 1.2±0.21             | 1.07±0.12              | 1.16±0.18            | 1.22±0.26               |
| LV EF (%)    | 61±6                 | 60±8                   | 54±13                | 58±9                    |
| LV FS (%)    | 32±4                 | 31±5                   | 28±9                 | 31±6                    |
| LVM (mg)     | 121±17               | 87±13 <sup>§</sup>     | 125±19               | 123±20                  |
| LVM index    | 3.4±0.42             | 2.78±0.42*             | 2.52±0.51            | 3.05±0.57 <sup>#</sup>  |
| Mitral valve |                      |                        |                      |                         |
| E (m/s)      | 843±111              | 847±128                | 758±135              | 820±180                 |
| A (m/s)      | 506±168              | 631±368                | 494±146              | 410±129                 |
| E/A ratio    | 1.8±0.52             | 1.8±0.61               | 1.5±0.29             | 2±0.67 <sup>#</sup>     |

**Supplemental Table 2. Echocardiography parameters in baseline CD1 mice.** BW, body weight; HR, heart rate; LVV, left ventricular (LV) volume; LVID, LV internal dimension; IVST, interventricular septum thickness; PWT, posterior wall thickness; LV EF, LV ejection fraction; LV FS, LV fractional shortening; LVM, LV mass. E, A, E/A ratio, early diastolic (E) and late diastolic velocities (A) and ratio of early vs late diastolic velocity (E/A). Data are presented as mean±SD. Number (n). \*P < 0.05; #P < 0.01; §P < 0.001 vs. WT age-matched mice using the unpaired two-tailed Student's t-test.



## Supplemental Methods

### Mouse Cardiac Models

Mouse cardiac procedures were performed as previously described under the operating microscope (1). Briefly, 7-9 weeks old CD1 WT and *Slit3*<sup>-/-</sup> mice were selected and their body weight ranged from 25 to 35g. Mice were anesthetized using 2.5% isoflurane, intubated with a 20-gauge angiocatheter, and artificially ventilated with a Kent Scientific Physio Suite.

For transverse aortic constriction (TAC), a limited median sternotomy was performed from the suprasternal notch to the second rib. The transverse aorta was freed by dissection using a 26-gauge blunt hook, and 6-0 silk suture was placed around the aorta between the innominate and the left common carotid artery using a 23-gauge ligation aid. A loose double knot was made, and a blunt 26-gauge needle was placed over the aortic arch. The suture was then tightened, and the blunt needle was immediately removed. Two additional knots were performed to secure the tie.

For pulmonary artery banding (PAB), a left lateral thoracotomy under the second rib was performed, and the main pulmonary trunk was identified under the left atrial appendage. The main pulmonary trunk was freed by dissection using a 26-gauge blunt hook, and a 6-0 silk suture was placed around the main pulmonary trunk using a 23-gauge ligation aid. A loose double knot was made, and a blunted 24-gauge needle was placed over the main pulmonary trunk. The suture was then tightened, and the blunt needle was immediately removed. Two additional knots were performed to secure the tie.

For left anterior descending (LAD) coronary artery ligation, a left lateral thoracotomy under the third rib was performed, and the LAD coronary artery was visualized running from underneath of the left atrium toward the apex. If the LAD artery couldn't be visualized, the left atrium could be lifted so that the origin of the LAD artery from the aorta was located. The LAD artery was ligated 1 mm below the tip of the left auricle in its normal position, with 6/0 silk suture and three knots, which induced roughly 40–50% ischemia of the LV. Occlusion was confirmed by the color change, becoming pale, of the anterior wall of LV.

After thoracic procedures, the chest cavity and skin wound were closed with 6/0 suture, and air in the chest cavity was evacuated by 20-gauge angiocatheter. Until spontaneous breathing resumed, the tracheal intubation was removed, and the mice were transferred to an oxygen cage until totally anesthesia recovery. At 3 days after TAC or PAB, all surviving mice underwent echocardiography to measure peak aortic or pulmonary arterial pressure gradient. Mice with peak aortic gradient less than 25 mmHg after TAC and mice with peak pulmonary arterial gradient less than 20 mmHg after PAB were excluded. All these mice with satisfactory surgery and survived for the first 24 hours were included in the overall survival curve analysis. The mice were sacrificed due to staggered time points analysis, for example, 1, 3 and 8 weeks after TAC and 2 and 4 weeks after PAB, and other obvious non-cardiac vascular problems were record as censored.

### Echocardiography

Trans-thoracic echocardiography was performed by the University of Michigan Cardiovascular Phenotyping Core, as previously described (2). Briefly, the induction of

anesthesia was performed with 6% isoflurane. Animals were then placed on a warming pad to maintain normothermia. In all studies, maintenance isoflurane (1-1.5%) was delivered with 100% oxygen, and the mice were anesthetized for less than 30 min in total. After the application of depilatory cream to the chest and upper abdomen, ECG electrodes were placed. Two-dimensional, M-mode, Doppler, and tissue Doppler echocardiography images were recorded using a Visual Sonics Vevo 2100 high-resolution in vivo microimaging system with an MS 550D transducer that has a center frequency of 40 MHz and a bandwidth of 22–55 MHz with the animal in a supine or lateral position. The LV ejection fraction was calculated from the two-dimensional long-axis view. The LV systolic and diastolic dimensions and wall thickness were determined by M-mode in the parasternal short-axis view at the level of the papillary muscles. Fractional shortening and ejection fraction were also determined from the M-mode parasternal short-axis view. The determination of RV parameters was performed as described by Shah et al (3). Briefly, a modified parasternal long-axis view and a modified parasternal short axis view were used to determine RV dimensions and RV fractional shortening, respectively.

### **Primary murine cell isolation and culture**

Cells were isolated from 6-8 weeks old CD1 WT and *Slit3*<sup>-/-</sup> mice. Cardiac fibroblasts and cardiomyocytes (4), lung fibroblasts (5), as well as aortic adventitial fibroblasts and vascular smooth muscle cells (6) were isolated and cultured as described. Briefly, the 100X collagenase, 100X elastase, EDTA, cardiac perfusion, HBSS, and PBS buffers were freshly prepared for each isolation. After being anesthetized and cleaned with 70% ethanol, a sternotomy was performed to expose the heart. The right ventricle (RV) was injected with 10 ml of 4°C PBS to flush the blood from the heart, lungs, and aorta. After clamping the ascending aorta, the heart was removed. Then the LV was perfused with 20 ml EDTA buffer for 7 minutes and 5 ml perfusion buffer for 2 minutes. The lung and aorta were then removed and stored in HBSS buffer at 4°C. The LV was perfused with 20 ml of 37°C 1X cardiac collagenase buffer for about 30 minutes and then gently teased apart while bathed in perfusion buffer. The resulting cell suspension was passed through a 100 µm filter and then underwent four sequential rounds of gravity precipitation to gradually restore the calcium concentration. The cell pellet represented a highly pure cardiomyocyte fraction, and the supernatants were combined, centrifuged at 50 x g for 1 minute to remove the remaining cardiomyocytes, and then centrifuged at 200 x g for 5 minutes to collect cardiac fibroblasts.

For isolation of lung fibroblasts, the harvested lungs were cut into small pieces and digested with 1X collagenase buffer for 3-5 hours at 37°C until the pieces could be mixed with 200 µl pipette tips. For aortic cell isolation, the thoracic aorta was immersed in 37°C 1X collagenase buffer for 10 minutes to loosen the connection between the media and adventitia. Fine forceps were then used to gently remove the adventitia from the media under an operating microscope. The aortic adventitia was cut into small pieces and digested with 1X collagenase buffer for 1-2 hours at 37°C. The aortic media was cut into small pieces and digested with 1X collagenase/elastase buffer for 1-2 hours at 37°C. All these digested tissue suspensions were diluted with HBSS buffer and centrifuged at 200 x g for 5 minutes to remove collagenase or elastase in the supernatant. Then all tissue pellets

were resuspended in DMEM/F12 medium containing 10% FBS, 4 ng bFGF, and 1X antibiotic/antimycotic. Isolated cells were cultured in a humidified tissue culture incubator at 37°C, 5% CO<sub>2</sub>, and not moved in the first three days. Thereafter, the medium was renewed every 24 hours. When 90% confluence was reached, cells were passaged using TrypLE™ Express (Gibco) at the ratio of 1:2. Fibroblasts and VSCMCs were used at passage <4.

#### **Sequences of RT qPCR primer pairs**

*Gapdh*, 95bp, Forward primer CTGCGACTTCAACAGCAACT, Reverse primer TCTTGCTCAGTGTCTTGCT  
*Slit3*, 104bp, Forward primer GCGCGATTTGGAGATCCTCA, Reverse primer TGGAGTGTAGACGCAGAGTCC;  
*Robo1*, 132bp, Forward primer CCTTCAGACCTGATCGTCTCC, Reverse primer TGAGCGCGGGTCATCTTTG;  
*Nppa*, 126bp, Forward primer GCTTCCAGGCCATATTGGAG, Reverse primer GGGGGCATGACCTCATCT;  
*Nppb*, 222bp, Forward primer AAGCTGCTGGAGCTGATAAGA, Reverse primer GTTACAGCCCAAACGACTGAC;  
*Myh7*, 119bp, Forward primer CCTGCGGAAGTCTGAGAAGG, Reverse primer CTCGGGACACGATCTTGGC;  
*Ctgf*, 151bp, Forward primer GGGCCTCTTCTGCGATTTC, Reverse primer ATCCAGGCAAGTGCATTGGTA;  
*Col1a1*, 103bp, Forward primer GCTCCTCTTAGGGGCCACT, Reverse primer CCACGTCTCACCATTGGGG;  
*Col3a1*, 154bp, Forward primer ACGTAGATGAATTGGGATGCAG, Reverse primer GGGTTGGGGCAGTCTAGTG;  
*Yap1*, 176bp, Forward primer ACCCTCGTTTTGCCATGAAC, Reverse primer TTGTTTCAACCGCAGTCTCTC;  
*Acta2*, 98bp, Forward primer CTGACAGAGGCACCACTGAA, Reverse primer CATCTCCAGAGTCCAGCACA;  
*Fn1*, 124bp, Forward primer ATGTGGACCCCTCCTGATAGT, Reverse primer GCCCAGTGATTCAGCAAAGG.

#### **Cell functional assays.**

**MTT cell proliferation assay.** Aortic adventitial fibroblasts were seeded in two 96-well plates (0-hour timepoint plate and 48-hour timepoint plate) at 8,000 cells per well and incubated at 37°C, 5% CO<sub>2</sub> for 6 h. Then, 20 µl of MTT reagent (5 mg/ml) was added to each well of the 0-hour timepoint plate, and the wells of the 48-hour timepoint plate were renewed with PBS or PDGF-BB (100 ng/ml) added to media with 10% FBS. Forty-eight hours later, 20 µl MTT reagent was added to each well of the 48-hour timepoint plate. After the addition of MTT reagent, the cells were incubated for another 4 hours until a purple-colored precipitate was visible. Next, the medium from the wells was aspirated and 150 µl of MTT solvent was added to each well. The plates were covered with foil and placed on an orbital shaker for 20 minutes. The absorbance of each well was measured using a spectrophotometer at 560

nm and a reference filter at 750 nm. Then the optical density (OD) of each well at 560 nm was determined by subtracting the absorption at the reference wavelength (750 nm). Next, the corrected OD values were normalized to the starting cell numbers by dividing by the average OD value of the 0-hour timepoint wells.

*Scratch wound and migration assay.* Fibroblast migration was determined by in vitro scratch wound healing assays in 6-well plates. When the fibroblasts reached 100% confluence, they were synchronized in 1% FBS medium for 24 hours. Then a linear scratch was created with a 200  $\mu$ l pipette tip and cells were subjected to PBS or PDGF-BB (100 ng/ml) treatment for 24 hours. Changes in the wound area were imaged at 0 and 24 hours and quantified using Image-Pro Plus (version 7).

*Floating collagen gel contraction assay.* Floating fibroblast collagen gel contraction assays were performed in 24-well plates. Each well was seeded with  $3 \times 10^5$  cells mixed in 500  $\mu$ l collagen gel (1mg/ml collagen type I). Collagen gel was made with 0.5% FBS medium and 3.83 mg/ml rat tail collagen type 1 gel (Corning, Ref 354236). Either PBS or TGF $\beta$ 1 (5.0 ng/ml) was added to the collagen gel. After gelation for one hour, the collagen gel was detached from the well bottom using a 10  $\mu$ l pipette tip and allowed to float. Digital images of the floating gels were then acquired at 0 and 24 hours and the gel areas were quantified using Image-Pro Plus (version 7).

## Supplemental References

1. Tarnavski O, McMullen JR, Schinke M, Nie Q, Kong S, and Izumo S. Mouse cardiac surgery: comprehensive techniques for the generation of mouse models of human diseases and their application for genomic studies. *Physiol Genomics*. 2004;16(3):349-60.
2. Zolov SN, Bridges D, Zhang Y, Lee WW, Riehle E, Verma R, et al. In vivo, Pikfyve generates PI(3,5)P2, which serves as both a signaling lipid and the major precursor for PI5P. *Proc Natl Acad Sci U S A*. 2012;109(43):17472-7.
3. Shah M, Phillips MR, Quintana M, Stupp G, and McLean SE. Echocardiography allows for analysis of pulmonary arterial flow in mice with congenital diaphragmatic hernia. *J Surg Res*. 2018;221:35-42.
4. Ackers-Johnson M, Li PY, Holmes AP, O'Brien SM, Pavlovic D, and Foo RS. A Simplified, Langendorff-Free Method for Concomitant Isolation of Viable Cardiac Myocytes and Nonmyocytes From the Adult Mouse Heart. *Circ Res*. 2016;119(8):909-20.
5. Seluanov A, Vaidya A, and Gorbunova V. Establishing primary adult fibroblast cultures from rodents. *J Vis Exp*. 2010(44).
6. Adhikari N, Shekar KC, Staggs R, Win Z, Steucke K, Lin YW, et al. Guidelines for the isolation and characterization of murine vascular smooth muscle cells. A report from the International Society of Cardiovascular Translational Research. *J Cardiovasc Transl Res*. 2015;8(3):158-63.

# Full unedited gel for Figure 7H

## Cardiac fibroblasts (CFs)

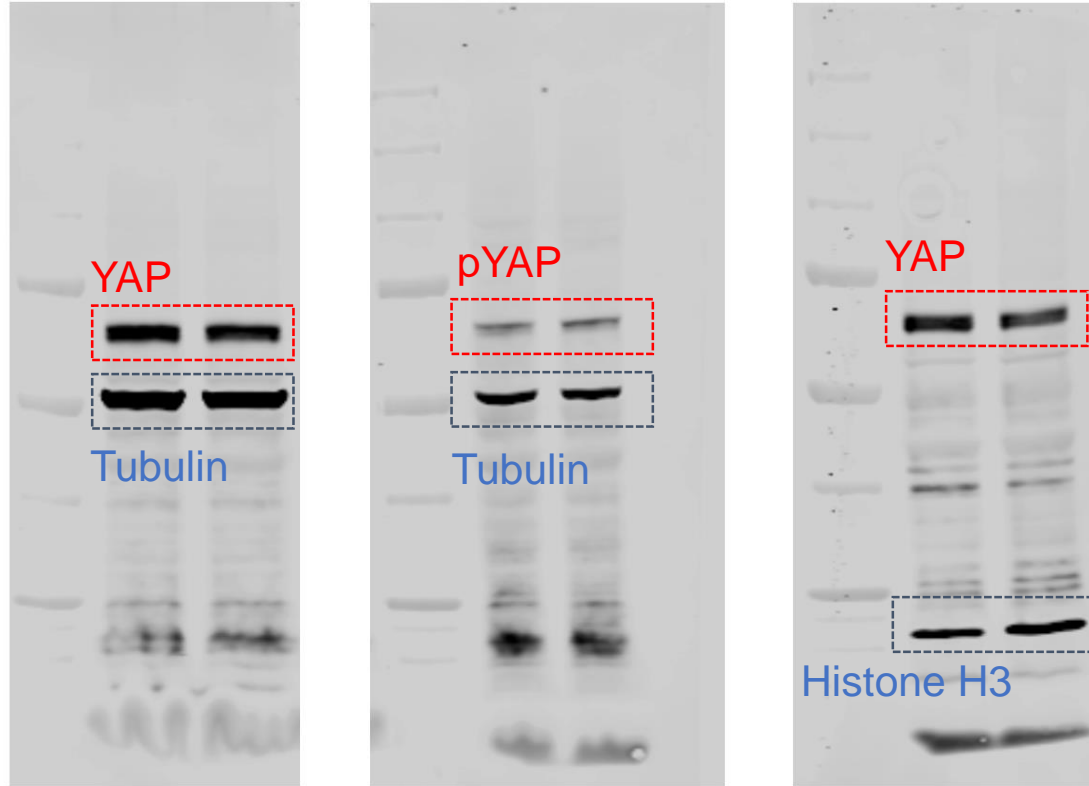

Whole lysates

Cytoplasmic fractions

Nuclear fractions

## Lung fibroblasts (LFs)

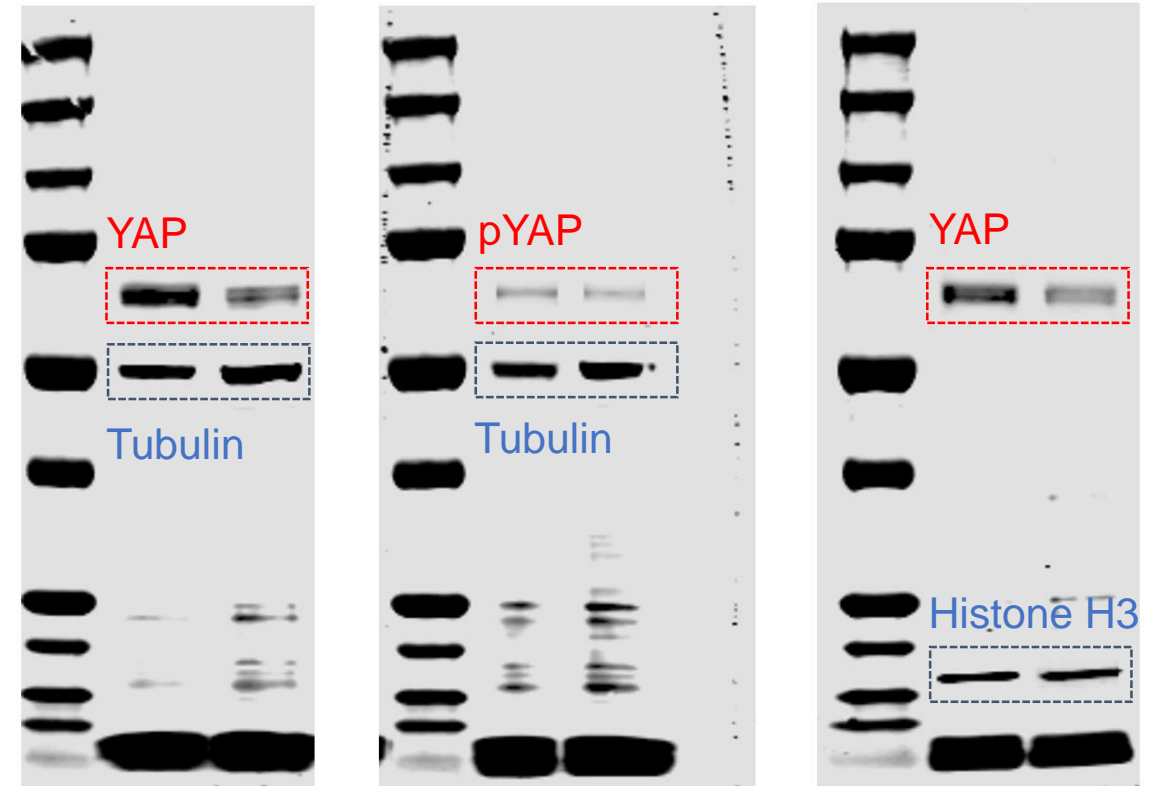

Whole lysates

Cytoplasmic fractions

Nuclear fractions
